1 **Predicting Brain Amyloid using Multivariate Morphometry Statistics,**  
2 **Sparse Coding, and Correntropy: Validation in 1,101 Individuals**  
3 **from the ADNI and OASIS Databases**

4

5 Jianfeng Wu BS<sup>1a</sup>, Qunxi Dong, PhD<sup>2,1a</sup>, Jie Gui PhD<sup>3</sup>, Jie Zhang PhD<sup>1</sup>, Yi Su PhD<sup>4</sup>,  
6 Kewei Chen PhD<sup>4</sup>, Paul M. Thompson PhD<sup>5</sup>, Richard J. Caselli MD<sup>6</sup>,  
7 Eric M. Reiman MD<sup>4</sup>, Jieping Ye PhD<sup>3</sup>, Yalin Wang PhD<sup>1</sup>,  
8 for the Alzheimer's Disease Neuroimaging Initiative \*

9 <sup>1</sup>**School of Computing, Informatics, and Decision Systems Engineering,**  
10 **Arizona State University, Tempe, AZ, USA**

11 <sup>2</sup>**Institute of Engineering Medicine, Beijing Institute of Technology, Beijing, China**

12 <sup>3</sup>**Department of Computational Medicine and Bioinformatics, University of**  
13 **Michigan, Ann Arbor, MI, USA**

14 <sup>4</sup>**Banner Alzheimer's Institute, 100 Washtenaw Avenue, Phoenix, AZ, USA**

15 <sup>5</sup>**Imaging Genetics Center, Stevens Neuroimaging and Informatics Institute,**  
16 **University of Southern California, Marina del Rey, CA, USA**

17 <sup>6</sup>**Department of Neurology, Mayo Clinic Arizona, Scottsdale, AZ, USA**

18 <sup>a</sup>**Authors contributed equally**

19

20 Please address correspondence to:

21 Dr. Yalin Wang

22 School of Computing, Informatics, and Decision Systems Engineering

23 Arizona State University

24 P.O. Box 878809

25 Tempe, AZ 85287 USA

26 **Phone:** (480) 965-6871

27 **Fax:** (480) 965-2751

28 **E-mail:** [ylwang@asu.edu](mailto:ylwang@asu.edu)

29

30 **\*Acknowledgments:** Data used in preparation of this article were obtained from the Alzheimer's Disease  
31 Neuroimaging Initiative (ADNI) database ([adni.loni.usc.edu](http://adni.loni.usc.edu)). As such, the investigators within the ADNI  
32 contributed to the design and implementation of ADNI and/or provided data but most of them did not participate in  
33 analysis or writing of this report. A complete listing of ADNI investigators may be found at  
34 [http://adni.loni.usc.edu/wpcontent/uploads/how\\_to\\_apply/ADNI\\_Acknowledgement\\_List.pdf](http://adni.loni.usc.edu/wpcontent/uploads/how_to_apply/ADNI_Acknowledgement_List.pdf).

35 **ABSTRACT (248 words)**

36 Biomarker-assisted preclinical/early detection and intervention in Alzheimer's disease (AD)  
37 may be the key to therapeutic breakthroughs. One of the presymptomatic hallmarks of AD is  
38 the accumulation of beta-amyloid (A $\beta$ ) plaques in the human brain. However, current methods  
39 to detect A $\beta$  pathology are either invasive (lumbar puncture) or quite costly and not widely  
40 available (amyloid PET). Our prior studies show that MRI-based hippocampal multivariate  
41 morphometry statistics (MMS) are an effective neurodegenerative biomarker for preclinical  
42 AD. Here we attempt to use MRI-MMS to make inferences regarding brain A $\beta$  burden at the  
43 individual subject level. As MMS data has a larger dimension than the sample size, we propose  
44 a sparse coding algorithm, Patch Analysis-based Surface Correntropy-induced Sparse coding  
45 and max-pooling (PASCS-MP), to generate a low-dimensional representation of hippocampal  
46 morphometry for each subject. Then we apply these individual representations and a binary  
47 random forest classifier to predict brain A $\beta$  positivity for each person. We test our method in  
48 two independent cohorts, 841 subjects from the Alzheimer's Disease Neuroimaging Initiative  
49 (ADNI) and 260 subjects from the Open Access Series of Imaging Studies (OASIS).  
50 Experimental results suggest that our proposed PASCS-MP method and MMS can discriminate  
51 A $\beta$  positivity in people with mild cognitive impairment (MCI) (Accuracy (ACC)=0.89 (ADNI))  
52 and in cognitively unimpaired (CU) individuals (ACC=0.79 (ADNI) and ACC=0.81 (OASIS)).  
53 These results compare favorably relative to measures derived from traditional algorithms,  
54 including hippocampal volume and surface area, shape measures based on spherical harmonics  
55 (SPHARM), and our prior Patch Analysis-based Surface Sparse-coding and Max-Pooling  
56 (PASS-MP) methods.

57

58 **Keywords:**

59 Alzheimer's disease, Hippocampal Multivariate Morphometry Statistics (MMS), Dictionary  
60 and Correntropy-induced Sparse Coding, Beta-amyloid (A $\beta$ ) burden.

61

## 62 1. INTRODUCTION

63 Alzheimer's disease (AD) is a major public health concern with the number of affected  
64 individuals expected to triple, reaching 13.8 million by the year 2050 in the U.S. alone  
65 (Brookmeyer et al., 2007). Current therapeutic failures in patients with dementia due to AD  
66 may be due to interventions that are too late, or targets that are secondary effects and less  
67 relevant to disease initiation and early progression (Hyman, 2011). Preclinical AD is now  
68 viewed as a gradual process that begins many years before the onset of clinical symptoms.  
69 Measuring brain biomarkers and intervening at preclinical AD stages are believed to improve  
70 the probability of therapeutic success (Brookmeyer et al., 2007; Jack et al., 2016; Sperling et  
71 al., 2011). In the A/T/N system - a recently proposed research framework for understanding the  
72 biology of AD - the presence of abnormal levels of A $\beta$  in the brain or cerebrospinal fluid (CSF)  
73 is used to define the presence of biological Alzheimer's disease (Jack et al., 2016). An  
74 imbalance between production and clearance of A $\beta$  occurs early in AD and is typically followed  
75 by the accumulation of tau protein tangles (another key pathological hallmark of AD) and  
76 neurodegeneration detectable on brain magnetic resonance imaging (MRI) scans (Hardy and  
77 Selkoe, 2002; Jack et al., 2016; Sperling et al., 2011). Brain A $\beta$  pathology can be measured  
78 using positron emission tomography (PET) with A $\beta$ -sensitive radiotracers, or in CSF. Even so,  
79 these invasive and expensive measurements are less attractive to subjects in preclinical stage  
80 and PET scanning is also not as widely available as MRI.

81 Blood-based biomarkers (BBBs) are somewhat effective for inferring A $\beta$  burden in the  
82 brain and CSF, and are less expensive than imaging (Bateman et al., 2019; Janelidze et al.,  
83 2020; Palmqvist et al., 2020). Even so, structural MRI biomarkers are largely accessible, cost-  
84 effective, and widely used in AD imaging research as well as for clinical diagnosis.  
85 Consequently, there is great research interest in using MRI biomarkers to predict brain A $\beta$   
86 burden (Pekkala et al., 2020; Reisa A. Sperling et al., 2011; Tosun et al., 2016, 2014). Tosun et  
87 al. (2014) combine MRI-based measures of cortical shape and cerebral blood flow to predict  
88 A $\beta$  status for early-MCI individuals and achieve an 83% accuracy with the LASSO approach  
89 (least absolute shrinkage and selection operator). Pekkala et al. (2020) use brain MRI measures

90 (volumes of the cortical gray matter, hippocampus, accumbens, thalamus and putamen) to infer  
91  $A\beta$  positivity in cognitively unimpaired (CU) subjects; they achieve a 0.70 area under the  
92 receiver operator curve (AUC) with their Disease State Index (DSI) algorithm. Although brain  
93 structural volumes are perhaps the most commonly used neuroimaging measures in AD  
94 research (Cacciaglia et al., 2018; Crivello et al., 2010; Reiter et al., 2017), surface-based  
95 subregional structure measures can offer advantages over volume measures as they contain  
96 more detailed and patient-specific shape information (Apostolova et al., 2010; Ching et al.,  
97 2020; Costafreda et al., 2011; Dong et al., 2020b, 2019; Morra et al., 2009; Qiu et al., 2009;  
98 Shen et al., 2009; Styner et al., 2004; Paul M Thompson et al., 2004; Younes et al., 2014).

99 Our prior studies (Shi et al., 2014; Wang et al., 2011, 2010) propose novel multivariate  
100 morphometry statistics (MMS) and apply them to analyze APOE4 dose effects on brain  
101 structures of nondemented and CU groups from the ADNI cohort (Dong et al., 2019; Li et al.,  
102 2016; Shi et al., 2014). Our proposed MMS approach uses multivariate tensor-based  
103 morphometry (mTBM) to encode morphometry along the surface tangent direction and radial  
104 distance (RD) to encode morphometry along the surface normal direction. This approach  
105 performs better for detecting clinically-relevant group differences, relative to other TBM-based  
106 methods including those using the Jacobian determinant, the largest and smallest eigenvalues  
107 of the surface metric and the pair of eigenvalues of the Jacobian matrix (Wang et al., 2011,  
108 2010). Our recent studies (Dong et al., 2020b, 2019) show that MMS outperforms volume  
109 measures for detecting hippocampal and ventricular deformations in groups at high risk for AD  
110 at the preclinical stage. Our other related work (Wu et al., 2018) has studied hippocampal  
111 morphometry in cohorts consisting of  $A\beta$  positive AD patients ( $A\beta+$  AD) and  $A\beta$  negative  
112 cognitively unimpaired subjects ( $A\beta-$  CU) using the MMS measure. We find significant  $A\beta+$   
113 AD vs.  $A\beta-$  CU group differences, using Hotelling's  $T^2$  tests. As MMS have a high dimension,  
114 it is not suitable for classification research directly. Therefore, we apply a Patch Analysis-based  
115 Surface Sparse-coding and Max-Pooling (PASS-MP) system for a low-dimensional  
116 representation of hippocampal MMS, and the binary group random forest classification of  $A\beta+$   
117 AD and  $A\beta-$  CU, achieving an accuracy rate of 90.48%. These studies show that MMS can

118 distinguish clinical groups with different A $\beta$  status. We have also successfully applied PASS-  
119 MP for MMS-based AD cognitive scores and autism spectrum disorder predictions (Dong et  
120 al., 2020a; Fu et al., 2021).

121 In this work, we optimize the objective function of the PASS-MP system by introducing  
122 correntropy measure (Gui et al., 2017) and propose an improved sparse coding, dubbed as the  
123 Patch Analysis-based Surface Correntropy-induced Sparse-coding and max-pooling (PASCs-  
124 MP) method. PASCs-MP does not only take the advantage of the computational efficiency of  
125 PASS-MP in its new optimization strategy, but also effectively reduces the negative influence  
126 of non-Gaussian noise in the data, which tremendously improves the prediction accuracy.  
127 PASCs-MP is an unsupervised learning method to generate a low-dimensional representation  
128 for each sample. We leverage the novel PASCs-MP method on MMS to further explore  
129 hippocampal morphometry differences for the following contrasts at the individual subject level:  
130 (1) A $\beta$  positive individuals with mild cognitive impairment (A $\beta$ + MCI) vs. A $\beta$  negative  
131 individuals with mild cognitive impairment (A $\beta$ - MCI) from ADNI, and (2) A $\beta$  positive  
132 cognitively unimpaired subjects (A $\beta$ + CU from ADNI and OASIS) versus A $\beta$  negative  
133 cognitively unimpaired subjects (A $\beta$ - CU from ADNI and OASIS). We apply the proposed  
134 PASCs-MP and a binary random forest classifier to classify individuals with different A $\beta$  status.  
135 We hypothesize that our MMS-based PASCs-MP may provide stronger statistical power  
136 relative to traditional hippocampal volume, surface area and spherical harmonics (SPHARM)  
137 based hippocampal shape measurements, in predicting subjects' A $\beta$  status. We expect that the  
138 knowledge gained from this type of research will enrich our understanding of the relationship  
139 between hippocampal atrophy and AD pathology, and thus help in assessing disease burden,  
140 progression, and treatment effects.

## 141 **2. SUBJECTS and METHODS**

### 142 **2.1 Subjects**

143 Data for testing the performance of our proposed framework and comparable methods are  
144 obtained from the ADNI database (Mueller et al., 2005, [adni.loni.usc.edu](http://adni.loni.usc.edu)) and the OASIS

145 database (Marcus et al., 2010). ADNI is the result of efforts of many co-investigators from a  
146 broad range of academic institutions and private corporations. Subjects are recruited from over  
147 50 sites across the U.S. and Canada. The primary goal of ADNI is to test whether biological  
148 markers, such as serial MRI and positron emission tomography (PET), combined with clinical  
149 and neuropsychological assessments, can measure the progression of MCI and early AD.  
150 Subjects originally recruited for ADNI-1 and ADNI-GO have the option to be followed in  
151 ADNI-2. For up-to-date information, see [www.adniinfo.org](http://www.adniinfo.org).

152 From the ADNI cohort, we analyze 841 age and sex-matched subjects with florbetapir PET  
153 data and T1-weighted MR images, including 151 AD patients, 342 MCI and 348 asymptomatic  
154 CU individuals. Among them, all the 151 AD patients, 171 people with MCI and 116 CU  
155 individuals were A $\beta$  positive. The remaining 171 MCI and 232 CU individuals were A $\beta$   
156 negative. From OASIS database, we analyze age-and-sex-matched 260 subjects with florbetapir  
157 PET data and T1-weighted MR images, including 52 A $\beta$  positive CU and 208 A $\beta$  negative CU.

158 **Table 1.** Demographic information for the subjects we study from the ADNI and OASIS cohorts.

| Database        | Group                   | Sex (M/F) | Age            | MMSE           | Centiloid       |
|-----------------|-------------------------|-----------|----------------|----------------|-----------------|
| ADNI<br>Cohort  | A $\beta$ + AD (n=151)  | 79/72     | 74.6 $\pm$ 7.8 | 22.6 $\pm$ 3.1 | 86.3 $\pm$ 27.4 |
|                 | A $\beta$ + MCI (n=171) | 92/79     | 74.1 $\pm$ 7.4 | 27.7 $\pm$ 1.7 | 76.8 $\pm$ 26.4 |
|                 | A $\beta$ - MCI (n=171) | 92/79     | 74.0 $\pm$ 7.4 | 28.3 $\pm$ 1.6 | 8.9 $\pm$ 14.9  |
|                 | A $\beta$ + CU (n=116)  | 45/71     | 75.9 $\pm$ 6.1 | 28.9 $\pm$ 1.1 | 71.1 $\pm$ 26.4 |
|                 | A $\beta$ - CU (n=232)  | 90/142    | 75.7 $\pm$ 6.3 | 29.0 $\pm$ 1.3 | 7.5 $\pm$ 14.5  |
| OASIS<br>Cohort | A $\beta$ + CU (n=52)   | 22/30     | 70.5 $\pm$ 7.5 | 29.0 $\pm$ 1.3 | 71.4 $\pm$ 20.9 |
|                 | A $\beta$ - CU (n=208)  | 88/120    | 68.5 $\pm$ 6.8 | 29.0 $\pm$ 1.3 | 8.5 $\pm$ 9.5   |

159 Values are mean  $\pm$  standard deviation where applicable.

160 In addition to each MRI scan, we also analyze the corresponding Mini-Mental State Exam  
161 (MMSE) scores (Folstein et al., 1975) and centiloid measures (Navitsky et al., 2018).  
162 Operationally, the *positivity* of A $\beta$  biomarkers is defined using standard cut-offs, with some  
163 efforts to reconcile differences among different A $\beta$  radiotracers using a norming approach  
164 called the centiloid scale (Klunk et al., 2015; Rowe et al., 2017). ADNI florbetapir PET data  
165 are processed using AVID pipeline (Navitsky et al., 2018), and OASIS florbetapir PET data are  
166 processed using PUP (Lee et al., 2013; Su et al., 2015). Both are converted to the centiloid

167 scales according to their respective conversion equations (Navitsky et al., 2018; Su et al., 2019).  
168 A centiloid cutoff of 37.1 is used to determine A $\beta$  positivity, this threshold corresponds to  
169 pathologically determined moderate to frequent plaques (Fleisher et al., 2011). **Table 1** shows  
170 demographic information we analyze from the ADNI and OASIS cohorts.

## 171 **2.2 Proposed pipeline**

172 This work develops the PASCs-MP framework to predict individual A $\beta$  burden (see **Fig.**  
173 **1** for the processing pipeline). In panel (1), hippocampal structures are segmented from  
174 registered brain MR images with FIRST from the FMRIB Software Library (FSL) (Paquette et  
175 al., 2017; Patenaude et al., 2011). Hippocampal surface meshes are constructed with the  
176 marching cubes algorithm (Lorensen and Cline, 1987). In panel (2), hippocampal surfaces are  
177 parameterized with the holomorphic flow segmentation method (Wang et al., 2007). After the  
178 surface fluid registration algorithm, the hippocampal MMS features are calculated at each  
179 surface point. We propose a PASCs-MP and classification system to refine and classify MMS  
180 patches in individuals with different A $\beta$  status. We randomly select patches on each  
181 hippocampal surface and generate a sparse code for each patch with our novel PASCs. Next,  
182 we adopt a max-pooling operation on the learned sparse codes of these patches to generate a  
183 new representation (a vector) for each subject. Finally, we train binary random forest classifiers  
184 on individual sparse codes in people with different A $\beta$  status; we validate them with 10-fold  
185 cross-validation. The whole system is publicly available<sup>1</sup>.

---

<sup>1</sup><http://gsl.lab.asu.edu/software/pass-mp/>

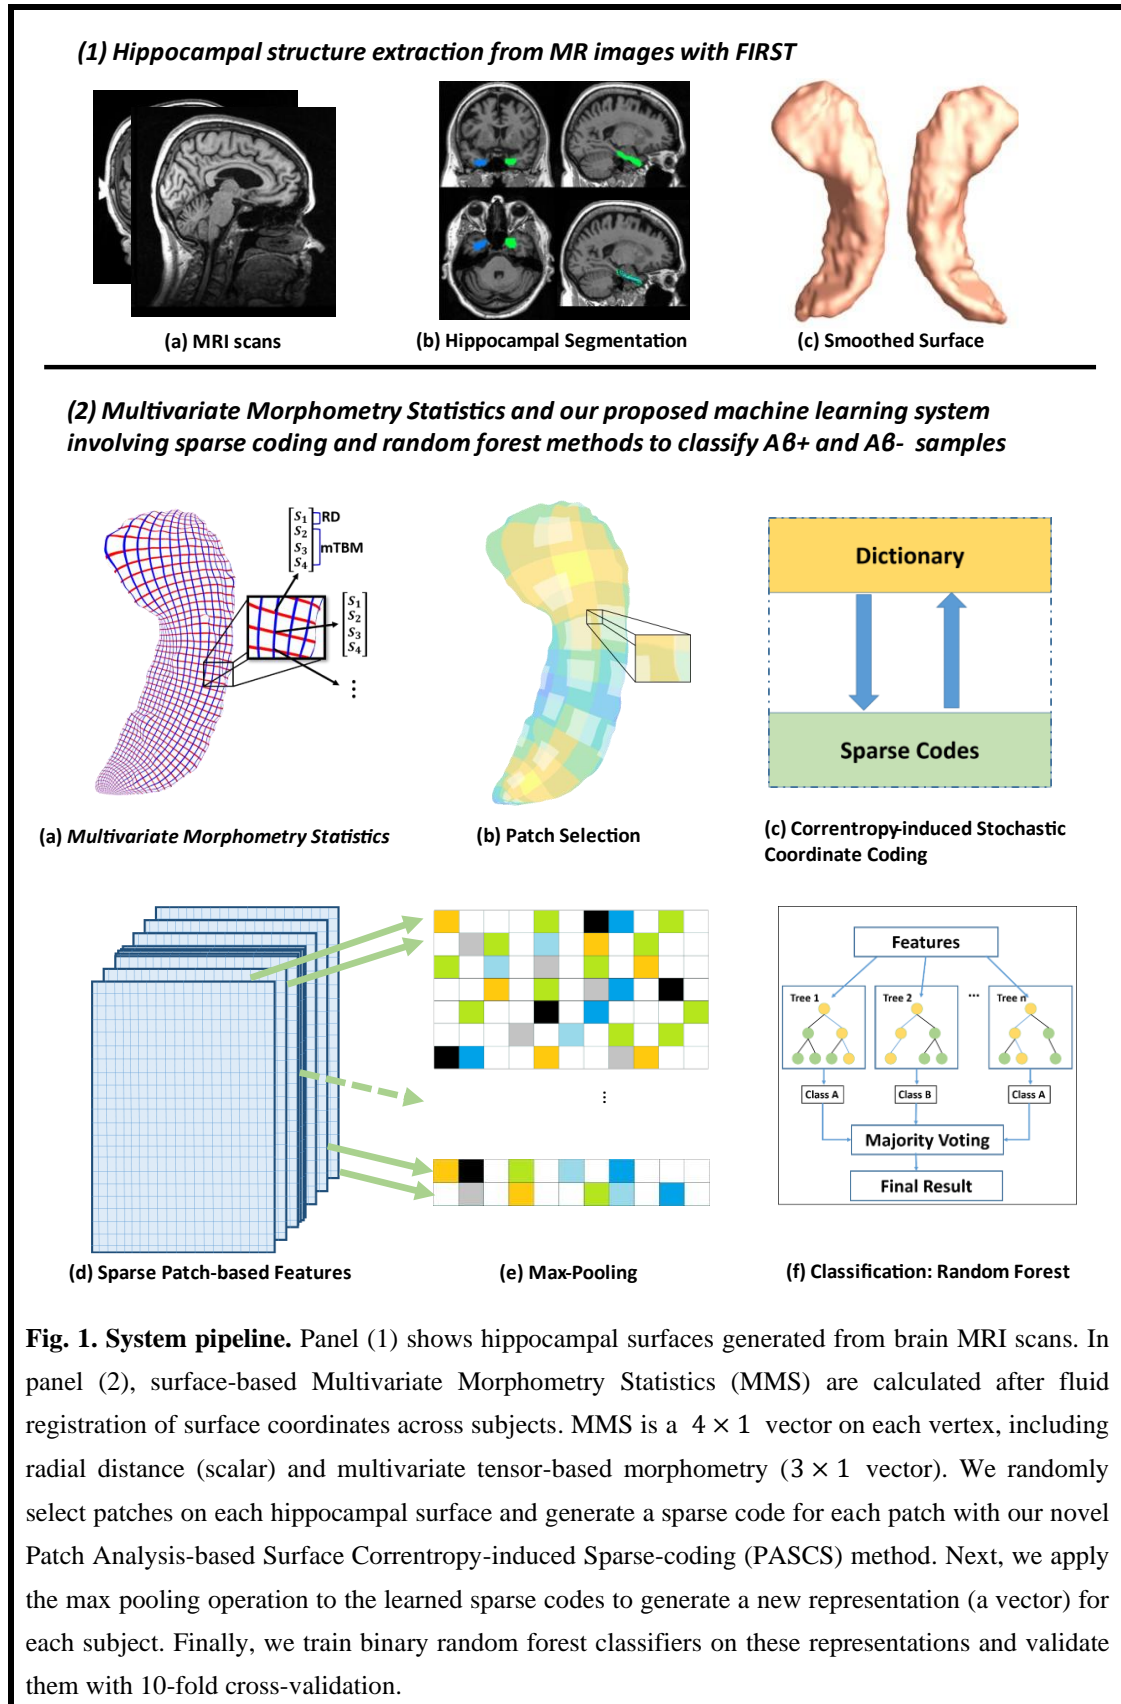



## 187 **2.2.1 Image Processing**

188 Firstly, we use FIRST (FMRIB's Integrated Registration and Segmentation Tool)  
189 (Patenaude et al., 2011) to segment the original MRI data and map the hippocampus  
190 substructure. After obtaining a binary segmentation of the hippocampus, we use a topology-  
191 preserving level set method (Han et al., 2003) to build surface models. Based on that, the  
192 marching cubes algorithm (Lorensen and Cline, 1987) is applied to construct triangular surface  
193 meshes. Then, to reduce the noise from MR image scanning and to overcome partial volume  
194 effects, surface smoothing is applied consistently to all surfaces. Our surface smoothing process  
195 consists of mesh simplification using *progressive meshes* (Hoppe, 1996) and mesh refinement  
196 by the Loop subdivision surface method (Loop, 1987). Similar procedures adopted in a number  
197 of our prior studies (Colom et al., 2013; Luders et al., 2013; Monje et al., 2013; Shi et al., 2015,  
198 2013b, 2013a; Wang et al., 2012, 2010) have shown that the smoothed meshes are accurate  
199 approximations to the original surfaces, with a higher signal-to-noise ratio (SNR).

200 To facilitate hippocampal shape analysis, we generate a conformal grid ( $150 \times 100$ ) on  
201 each surface, which is used as a canonical space for surface registration. On each hippocampal  
202 surface, we compute its conformal grid with a holomorphic 1-form basis (Wang et al., 2010;  
203 Wang et al., 2007). We adopt surface conformal representation (Shi et al., 2015, 2013a) to  
204 obtain surface geometric features for automatic surface registration. This consists of the  
205 conformal factor and mean curvature, encoding both intrinsic surface structure and information  
206 on its 3D embedding. After we compute these two local features at each surface point, we  
207 compute their summation and then linearly scale the dynamic range of the summation into the  
208 range 0-255, to obtain a feature image for the surface. We further register each hippocampal  
209 surface to a common template surface. With surface conformal parameterization and conformal  
210 representation, we generalize the well-studied image fluid registration algorithm (Bro-Nielsen  
211 and Gramkow, 1996; Agostino et al., 2003) to general surfaces. Furthermore, most of the image  
212 registration algorithms in the literature are not symmetric, i.e., the correspondences between  
213 the two images depending on which image is assigned as the deforming image and which is the  
214 non-deforming target image. An asymmetric algorithm can be problematic as it tends to

215 penalize the expansion of image regions more than shrinkage (Rey et al., 2002). Thus, in our  
216 system, we further extend the surface fluid registration method to an inverse-consistent  
217 framework (Leow et al., 2005). The obtained surface registration is diffeomorphic. For details  
218 of our inverse-consistent surface fluid registration method, we refer to (Shi et al., 2013a).

### 219 **2.2.2 Surface-based Morphometry Feature Extraction**

220 After parameterization and registration, we establish a one-to-one correspondence map  
221 between hippocampal surfaces. This makes it effective for us to compare and analyze surface  
222 data. Besides, each surface has the same number of vertices ( $150 \times 100$ ) as shown in panel 2  
223 of **Fig. 1**. The intersection of the red curve and the blue curve is a surface vertex, and at each  
224 vertex, we adopt two features, the radial distance (RD) and the surface metric tensor used in  
225 multivariate tensor-based morphometry (mTBM). The RD (a scalar at each vertex) represents  
226 the thickness of the shape at each vertex to the medial axis (Pizer et al., 1999; Thompson et  
227 al., 2004), this reflects the surface differences along the surface normal directions. The medial  
228 axis is determined by the geometric center of the isoparametric curve on the computed  
229 conformal grid (Wang et al., 2011). The axis is perpendicular to the isoparametric curve, so the  
230 thickness can be easily calculated as the Euclidean distance between the core and the vertex on  
231 the curve. The mTBM statistics (a  $3 \times 1$  vector at each vertex) have been frequently studied  
232 in our prior work (Shi et al., 2015, 2013b; Wang et al., 2010, 2009). They measure local surface  
233 deformation along the surface tangent plane and show improved signal detection sensitivity  
234 relative to more standard tensor-based morphometry (TBM) measures computed as the  
235 determinant of the Jacobian matrix (Wang et al., 2013). RD and mTBM jointly form a new  
236 feature, known as the surface multivariate morphometry statistics (MMS). Therefore, MMS is  
237 a  $4 \times 1$  vector at each vertex. The surface of the hippocampus in each brain hemisphere has  
238 15,000 vertices, so the feature dimensionality for each hippocampus in each subject is 60,000.

### 239 **2.2.3 Surface Feature Dimensionality Reduction**

240 The above mentioned vertex-wise surface morphometry feature, MMS, is a high-fidelity  
241 measure to describe the local deformation of the surface and can provide detailed localization

242 and visualization of regional atrophy or expansion (Yao et al., 2018) and development  
243 (Thompson et al., 2000). However, the high dimensionality of such features is likely to cause  
244 problems for classification. Feature reduction methods proposed by (Davatzikos et al., 2008;  
245 Sun et al., 2009) may ignore the intrinsic properties of a structure's regional morphometry.  
246 Therefore, we introduce the following feature reduction method for the vertex-wise surface  
247 morphometry features.

248 The surface MMS feature dimension is typically much larger than the number of subjects,  
249 i.e., the so-called *high dimension-small sample problem*. To extract useful surface features and  
250 reduce the dimension before making predictions, this work first randomly generates square  
251 windows on each surface to obtain a collection of small image patches with different amounts  
252 of overlap. In our prior AD studies (Wu et al., 2018; Zhang et al., 2016a, 2016b), we discuss  
253 the most suitable patch size and number. Therefore, in this work, we adopt the same optimal  
254 experimental settings, as 1,008 patches (patch size= $10 \times 10$  vertices) for each subject (504  
255 patches for each side of the hippocampal surface). As these patches are allowed to overlap, a  
256 vertex may be contained in several patches. The zoomed-in window in subfigure (b) of panel  
257 (2) in **Fig.1** shows overlapping areas on selected patches. After that, we use the technique of  
258 sparse coding and dictionary learning (Mairal et al., 2009) to learn meaningful features.  
259 Dictionary learning has been successful in many image processing tasks as it can concisely  
260 model natural image patches. In this work, we propose a novel sparse coding and dictionary  
261 learning method with an  $l_1$ -regularized correntropy loss function named *Correntropy-induced*  
262 *Sparse-coding (CS)*, which is expected to improve the computational efficiency compared to  
263 Stochastic Coordinate Coding (SCC) (Lin et al., 2014). Formally speaking, correntropy is a  
264 generalized similarity measure between two scalar random variables  $U$  and  $V$ , which is defined  
265 by  $\mathcal{V}_\sigma(U, V) = E\mathcal{K}_\sigma(U, V)$ . Here,  $\mathcal{K}_\sigma$  is a Gaussian kernel given by  $\mathcal{K}_\sigma(U, V) =$   
266  $\exp\{- (u - v)^2 / \sigma^2\}$  with the scale parameter  $\sigma > 0$ ,  $(u-v)$  being a realization of  $(U, V)$   
267 (Feng et al., 2015; Gui et al., 2017). Utilizing the correntropy measure as a loss function will  
268 reduce the negative influence of non-Gaussian noise in the data.

269 Classical dictionary learning techniques (Lee et al., 2007; Olshausen and Field, 1997)

270 consider a finite training set of feature maps,  $X = (x_1, x_2, \dots, x_n)$  in  $R^{p \times n}$ . In our study,  $X$  is  
 271 the set of MMS features from  $n$  surface patches of all the samples. All the MMS features on  
 272 each surface patch,  $x_i$ , is reshaped to a  $p$ -dimensional vector. And we desire to generate a new  
 273 set of sparse codes,  $Z = (z_1, z_2, \dots, z_n)$  in  $R^{m \times n}$  for these features. Therefore, we aim to  
 274 optimize the empirical cost function as **Eq. (1)**.

$$275 \quad f(D, z_i) \triangleq \sum_{i=1}^n l(x_i, D, z_i) \quad (1)$$

276 where  $D \in R^{p \times m}$  is the dictionary and  $z_i \in R^m$  is the sparse code of each feature vector.  
 277  $l(x_i, D, z_i)$  is the loss function that measures how well the dictionary  $D$  and the sparse code  
 278  $z_i$  can represent the feature vector  $x_i$ . Then,  $x_i$  can be approximated by  $x_i = Dz_i$ . In this  
 279 way, we convert the  $p$ -dimensional feature vector,  $x_i$ , to a  $m$ -dimensional sparse code,  $z_i$ ,  
 280 where  $m$  is the dimensionality of the sparse code and the dimensionality could be arbitrary. In  
 281 this work, we introduce the correntropy measure (Gui et al., 2017) to the loss function and  
 282 define the  $l_1$ -sparse coding optimization problem as **Eq. (2)**

$$283 \quad \min_{D, z_i} \frac{1}{2} \sum_{i=1}^n \exp\left(-\frac{\|Dz_i - x_i\|_2^2}{\sigma^2}\right) + \lambda \sum_{i=1}^n \|z_i\|_1 \quad (2)$$

284 where  $\lambda$  is the regularization parameter,  $\sigma$  is the kernel size that controls all properties of  
 285 correntropy.  $\|\cdot\|_2$  and  $\|\cdot\|_1$  are the  $l_2$ -norm and  $l_1$ -norm and  $\exp(\cdot)$  represents the exponential  
 286 function. The first part of the loss function measures the degree of the image patches' goodness  
 287 and the correntropy may help remove outliers. Meanwhile, the second part is well known as the  
 288  $l_1$  penalty (Fu, 1998) that can yield a sparse solution for  $z_i$  and select robust and informative  
 289 features. Specifically, there are  $m$  columns (atoms) in the dictionary  $D$  and each atom is  $d_j \in$   
 290  $R^p, j = 1, 2, \dots, m$ . To avoid  $D$  from being arbitrarily large and leading to arbitrary scaling of  
 291 the sparse codes, we constrain each  $l_2$ -norm of each atom in the dictionary no larger than one.  
 292 We will let  $C$  become the convex set of matrices verifying the constraint as **Eq. (3)**.

$$293 \quad C \triangleq \{D \in R^{p \times m} \text{ s. t. } \forall j = 1, 2, \dots, m, d_j^T d_j \leq 1\} \quad (3)$$

294 Note that, the empirical problem cost  $f(D, z_i)$  is not convex when we jointly consider the  
 295 dictionary  $D$  and the coefficients  $Z$ . But the function is convex concerning each of the two

296 variables,  $D$ , and  $Z$ , when the other one is fixed. Since it takes much time to solve  $D$  and  $Z$   
 297 when dealing with large-scale data sets and a large-size dictionary, we adopt the framework in  
 298 the stochastic coordinate coding (SCC) algorithm (Lin et al., 2014), which can dramatically  
 299 reduce the computational cost of the sparse coding, while keeping a comparable performance.

300 To solve this optimization problem, we reformulate the first part of the equation by the  
 301 half-quadratic technique (Nikolova and Ng, 2006) and then the objective can be solved as the  
 302 minimization problem **Eq.(4)**:

$$303 \quad \min_{D, Z_i} \frac{1}{2} \sum_{i=1}^n h_i \|Dz_i - x_i\|_2^2 + \lambda \sum_{i=1}^n \|z_i\|_1, h_i = \exp\left(-\frac{\|Dz_i - x_i\|_2^2}{\sigma^2}\right). \quad (4)$$

304 Here the auxiliary variable,  $h_i$ , will be updated in each update iteration. At each iteration, we  
 305 update  $D$  and  $Z$  alternately, which means we firstly fix  $D$  and update the sparse code  $Z$   
 306 with coordinated descent (CD) and then fix  $Z$  to update the dictionary  $D$  via stochastic  
 307 gradient descent (SGD).

308 As our optimization method is stochastic, we only update the sparse code and dictionary  
 309 with only one signal for each iteration. In the following paragraphs, we will discuss the  
 310 optimization in one iteration with only one signal. If a signal,  $x = (x_1, x_2, \dots, x_p)^T \in R^p$ , is  
 311 given, we first update its corresponding sparse code,  $z = (z_1, z_2, \dots, z_m)$ , via CD. Let  $z_l$   
 312 denote the  $l$ -th entry of  $z$  and  $d_{kl}$  represents the  $k$ -th item of  $d_l$ .  $d_l$  is the  $l$ -th  
 313 atom/column of the dictionary  $D$ . Then, we can calculate the partial derivative of  $z_l$  in the  
 314 first part of the function,  $f(D, z_i)$ , as **Eq. (5)**

$$\begin{aligned} 315 \quad \frac{\partial}{\partial z_l} c(D, z) &= \frac{\partial}{\partial z_l} \frac{1}{2} h \|Dz - x\|_2^2 = -h \sum_{k=1}^p d_{kl} \left( x_k - \sum_{r=1}^m d_{kr} z_r \right) \\ 316 \quad &= -h \sum_{k=1}^p d_{kl} \left( x_k - \sum_{r \neq l}^m d_{kr} z_r - d_{kl} z_l \right) \\ 317 \quad &= -h \sum_{k=1}^p d_{kl} \left( x_k - \sum_{r \neq l}^m d_{kr} z_r \right) + h z_l \sum_{k=1}^p (d_{kl})^2 \\ 318 \quad &= -\rho_l + h z_l v_l \end{aligned} \quad (5)$$

319 where  $\rho_l = h \sum_{k=1}^p d_{kl} (x_k - \sum_{r \neq l}^m d_{kr} z_r)$ ,  $v_l = \sum_{k=1}^p (d_{kl})^2$  and  $h$  is the auxiliary variable  
 320 for the signal. Since we normalize the atom,  $d_l$ , in each iteration,  $v_l$  can be ignored. Then, we

321 compute the subdifferential of the lasso loss function and equate it to zero to find the optimal  
 322 solution as follows:

$$323 \quad \frac{\partial}{\partial z_l} f(D, z) = \frac{\partial}{\partial z_l} c(D, z) + \frac{\partial}{\partial z_l} \lambda \|z\|_1 = -\rho_l + h z_l v_l + \frac{\partial}{\partial z_l} \lambda \|z\|_1 = 0 \quad (6)$$

324 Then, according to the derivative of the  $l_1$ -norm, we can have the following equations.

$$325 \quad \begin{cases} -\rho_l + h z_l v_l - \lambda = 0 & \text{if } z_l < 0 \\ -\rho_l - \lambda \leq 0 \leq -\rho_l + \lambda & \text{if } z_l = 0 \\ -\rho_l + h z_l v_l + \lambda = 0 & \text{if } z_l > 0 \end{cases} \quad (7)$$

326 Finally, we can get the soft thresholding function as:

$$327 \quad z_l = \begin{cases} \frac{\rho_l + \lambda}{h v_l} & \text{for } \rho_l < -\lambda \\ 0 & \text{for } -\lambda \leq \rho_l \leq \lambda \\ \frac{\rho_l - \lambda}{h v_l} & \text{for } \rho_l > \lambda \end{cases} \quad (8)$$

328 After we update the sparse code, we propose the following strategy to accelerate the  
 329 convergence for updating the dictionary  $D$ . The atom,  $d_l$  will stay unchanged if  $z_l$  is zero  
 330 since  $\nabla_{d_l} = h(Dz - x)z_l = 0$ . Otherwise, as shown in **Fig. 2**, we can update the  $l$ -th atom of  
 331 the dictionary  $D$  as  $d_l \leftarrow d_l - \gamma_l h(Dz - x)z_l$ .  $\gamma_l$  is the learning rate provided by an  
 332 approximation of the Hessian:  $R \leftarrow R + zz^T$  and  $\gamma_l$  is given by  $1/r_{ll}$ , where  $r_{ll}$  is the item  
 333 at the  $l$ -th row and  $l$ -th column of the Hessian matrix  $R$ . The pseudo-code of the model was  
 334 shown in **Alg. 1**, dubbed as PASCs.

---

**Alg. 1** Patch Analysis-based Surface Correntropy-induced Sparse-coding

---

Require: Data set  $X = (x_1, x_2, \dots, x_n)$  in  $\mathbb{R}^{p \times n}$

Ensure: Dictionary  $D \in \mathbb{R}^{p \times m}$  and sparse codes  $Z = (z_1, z_2, \dots, z_n) \in \mathbb{R}^{m \times n}$

Initialize:  $D^{1,1}, R = 0, z_i^0 = 0, h_i^0 = 1, i = 1, \dots, n$

1: for  $t = 1$  to  $\tau$  do

2:     for  $i = 1$  to  $n$  do

3:         Get an image patch  $x_i$  from  $X$ .

4:         Update  $z_i^t$  via coordinate descent:

$$z_i^t \leftarrow CD(x_i, D^{i,t}, z_i^{t-1}).$$

5:         Update Hessian matrix and the learning rate:

$$R \leftarrow R + z_i^t (z_i^t)^T, \gamma_{i,t} = 1/r_{i,t}.$$

6:         Update the support of the dictionary via SGD for non-zero entry  $z_{i,l}^t$  (and normalize it):

$$d_l^{i+1,t} \leftarrow d_l^{i,t} - \gamma_{i,t} h_i (D^{i,t} z_i^t - x_i) z_{i,l}^t.$$

7:         Update auxiliary variable  $h_i$ :

$$h_i = \exp\left(-\|D^{i,t} z_i^t - x_i\|_2^2 / \sigma^2\right).$$

8:         If  $i = n$ , Then  $D^{1,t+1} = D^{n,t}$ .

9:     end for

10: end for

Output:  $D = D^{n,\tau}$  and  $z_i = z_i^\tau$  for  $i = 1, \dots, n$

---

335

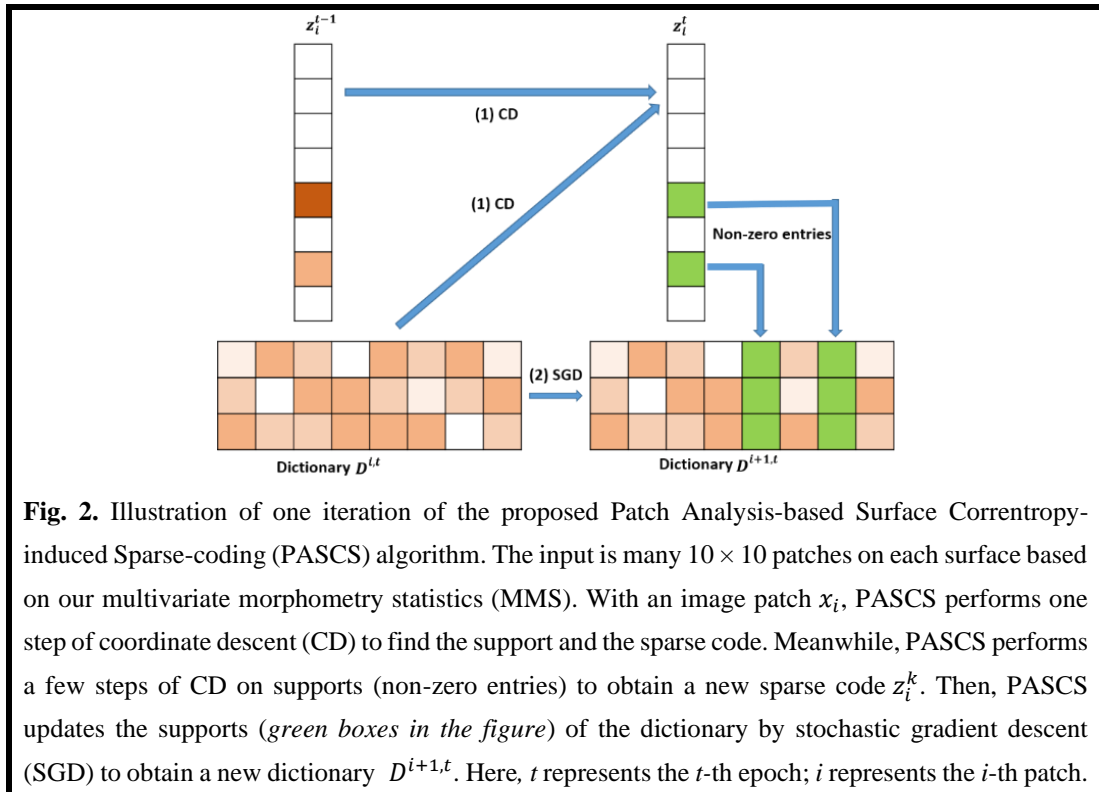

**Fig. 2.** Illustration of one iteration of the proposed Patch Analysis-based Surface Correntropy-induced Sparse-coding (PASCs) algorithm. The input is many  $10 \times 10$  patches on each surface based on our multivariate morphometry statistics (MMS). With an image patch  $x_i$ , PASCs performs one step of coordinate descent (CD) to find the support and the sparse code. Meanwhile, PASCs performs a few steps of CD on supports (non-zero entries) to obtain a new sparse code  $z_i^k$ . Then, PASCs updates the supports (green boxes in the figure) of the dictionary by stochastic gradient descent (SGD) to obtain a new dictionary  $D^{i+1,t}$ . Here,  $t$  represents the  $t$ -th epoch;  $i$  represents the  $i$ -th patch.

## 336 2.2.4 Pooling and Classification

337 After we get the sparse code (the dimension is  $m$ ) for each patch, the dimensionality of  
338 sparse codes for each subject is still too large for classification, which is  $m \times 1008$ . Therefore,  
339 we apply Max-pooling to reduce the feature dimensionality for each subject. Max-pooling  
340 (Boureau et al., 2010) is a way of taking the most responsive node of a given region of interest  
341 and serves as an important layer in the convolutional neural network architecture. In this work,  
342 we compute the maximum value of a particular feature over all sparse codes of a subject and  
343 generate a new representation for each subject, which is an  $m$ -dimensional vector. These  
344 summary representations are much lower in dimension, compared to using all the extracted  
345 surface patch features; this can improve results generalizability via less over-fitting.

346 With these dimension-reduced features, we choose the random forest algorithm (Liaw and  
347 Wiener, 2002) for the binary classification. Random forests are a combination of tree predictors  
348 such that each tree depends on the values of a random vector sampled independently and with  
349 the same distribution for all trees in the forest. This algorithm adopts a learning process called  
350 *feature bagging*. In this process, we select a random subset of the features several times and  
351 then train a decision tree for each subset. If some features are strong predictors of the response,  
352 they will be selected in many decision trees and this makes them correlated. In comparison with  
353 decision trees, random forests have the same bias but lower variance, which means they can  
354 overcome the drawback of overfitting caused by a small data set. For our sparse surface  
355 features, when the size of the training set becomes small, diversification becomes more subtle,  
356 and the method can better detect these subtle differences. In this project, we use the random  
357 forest classifier in the *scikit-learn* package (<https://scikit-learn.org/>) with the default settings.  
358 Besides, under the imbalanced-data condition (such as 116 A $\beta$ + CU and 232 A $\beta$ - CU in the  
359 ADNI data set), the classifier tends to classify all the training data into the major class, as it  
360 aims to maximize training accuracy. Therefore, we adopt *random undersampling* (Dubey et al.,  
361 2014) to balance the numbers of training subjects in the two classes. All the experiments in this  
362 work use the same setups for the random forest classifier and random undersampling.



### 363 **2.3 Performance Evaluation Protocol**

364 Before using hippocampal MMS features for A $\beta$  status classification, we need to apply  
365 PASCs-MP to extract sparse codes from these high dimensional MMS features. The  
366 performance of PASCs-MP has a close relationship to four key parameters: the patch size, the  
367 dimensionality of the learned sparse coding, the regularization parameter for the  $l_1$ -norm ( $\lambda$ ),  
368 and the kernel size ( $\sigma$ ) in the exponential function (see **Eq.(2)**). Patch-based analysis has been  
369 widely used for image segmentation and classification (Kao et al., 2020). Leveraging patches  
370 in our MMS can preserve well the properties of the regional morphometry of the hippocampal  
371 surface since the vertices that carry strong classification power are always clustered on the  
372 surface and a set of such vertices typically has a stronger classification ability compared to  
373 using just a single vertex. However, the size of the set of such vertices is unknown. Therefore,  
374 we select the vertices by randomly selecting the same number of square patches with different  
375 sizes and compared the performance of the final classification accuracy for the different patch  
376 sizes. The dimensionality of the learned sparse coding ( $m$ ) is also the dimensionality of the  
377 representation for each subject. The model might miss some significant information if the  
378 dimensionality is too low. Also, the representations will contain too much redundant  
379 information when the dimensionality is too large. The regularization parameter for the  $l_1$ -norm  
380 ( $\lambda$ ) will control the sparsity of the learned sparse codes. A suitable regularization parameter will  
381 select significant features meanwhile reducing noise. The kernel size in the exponential  
382 function controls all properties of correntropy. Correntropy is directly related to the probability  
383 of how similar two random variables are in a neighborhood of the joint space controlled by the  
384 kernel bandwidth, i.e., the kernel bandwidth acts as a zoom lens, controlling the *observation*  
385 *window* over which similarity is assessed. This adjustable window provides an effective  
386 mechanism to eliminate the detrimental effect of outliers (Liu et al., 2007).

387 Thus, we adopt 10-fold cross-validation to evaluate the classification accuracy on another  
388 dataset from ADNI 2 with a series of key parameter candidates and select the optimal parameter  
389 setups. The detailed information about the dataset and the key parameter candidates will be  
390 introduced in next section. For the 10-fold cross-validation, we randomly shuffle and split the

391 dataset into ten groups. We take one group as the test data set and use the remaining groups to  
392 train a model. Then, the candidate model is evaluated using the test data. In this way, we can  
393 get a predicted class label for all the samples. Then, the output of each classification experiment  
394 is compared to the ground truth, and the accuracy is computed to indicate how many class labels  
395 are correctly identified. The key parameters with the highest classification accuracies are  
396 selected.

397 Once we get an optimized PASCs-MP model, we can compare the performances of MMS,  
398 volume, and surface area measurements for classifying individuals of different A $\beta$  status. We  
399 use the volume from the left and right hippocampi (i.e., hippocampi in each brain hemisphere)  
400 as two features to train the classifier instead of adding them together. The same classification  
401 strategy is applied to surface areas from both sides. Moreover, we will compare the  
402 classification performances based on PASCs-MP, PASS-MP (Zhang et al., 2017b, 2016b) and  
403 SPHARM (Chung et al., 2008, 2007; Shi et al., 2013a). We evaluate these classification  
404 performances with the same 10-fold cross-validation method. Four performance measures: the  
405 Accuracy (ACC), Balanced Accuracy (B-ACC), Specificity (SPE) and Sensitivity (SEN) are  
406 computed (Bhagwat et al., 2018; Hinrichs et al., 2011; Ritter et al., 2015; Salvatore et al., 2018;  
407 Zhang et al., 2017b). We also compute the area-under-the-curve (AUC) of the receiver  
408 operating characteristic (ROC) (Bhagwat et al., 2018; Fan et al., 2008; La Joie et al., 2013;  
409 Nakamura et al., 2018). By considering these performance measures, we expect the proposed  
410 system integrating MMS, PASCs-MP and the binary random forest classifier to perform better  
411 than similar classification strategies for identifying individuals with different A $\beta$  status.

## 412 **3. RESULTS**

### 413 **3.1 Key Parameter Estimations for the PASCs-MP Method**

414 To apply PASCs-MP method on hippocampal MMS, four parameters need to be  
415 empirically assigned, namely: the patch size, the dimensionality of the learned sparse coding,  
416 the regularization parameter for the  $l_1$ -norm ( $\lambda$ ) and the kernel size ( $\sigma$ ) in the exponential  
417 function. Selecting suitable parameters will lead to superior performance in refining lower

418 dimensional MMS representations related to AD pathology. With 10-fold cross-validation,  
419 these key parameters are evaluated from PASCs-MP based classification performance on 109  
420 AD patients and 180 CU subjects of ADNI-2 cohort. To avoid data leakage, these subjects are  
421 not used in the following study of A $\beta$  burden classification.

422 In **Fig. 3**, we illustrate the classification accuracy for different values of each parameter.  
423 When we evaluate one parameter, we fix the rest parameters. For example, in the first bar chart  
424 in **Fig. 3**, we try different patch sizes including 5 $\times$ 5, 10 $\times$ 10, 15 $\times$ 15, 20 $\times$ 20 and 30 $\times$ 30 while we  
425 fix the sparse code dimensionality as to 1800, and set  $\lambda$  to 0.22, and  $\sigma$  to 3.6. By testing varied  
426 sets of parameters, we find that the optimal patch size is 10 $\times$ 10, the optimal sparse code  
427 dimensionality is 1800, the optimal  $\lambda$  is 0.22 and the optimal  $\sigma$  is 3.6 and these optimal  
428 parameters will be adopted in the study of A $\beta$  burden classification.

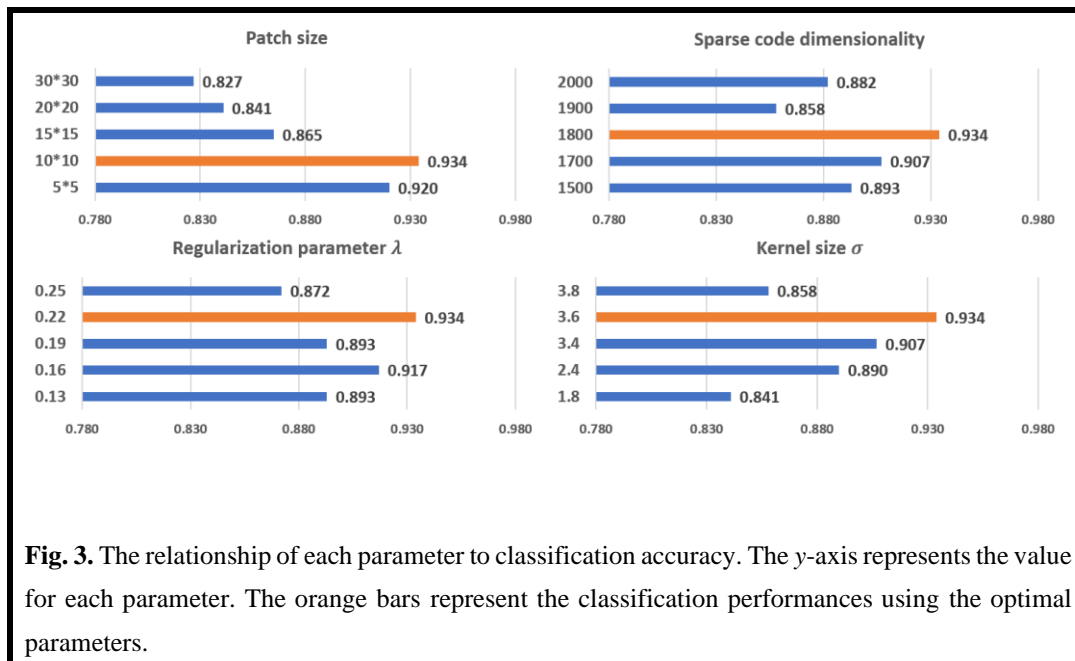

**Fig. 3.** The relationship of each parameter to classification accuracy. The y-axis represents the value for each parameter. The orange bars represent the classification performances using the optimal parameters.

### 429 3.2 Classification of A $\beta$ Burden

430 To explore whether there is a significant gain in classification power with our new system,  
431 based on our surface MMS, we generate two different kinds of sparse codes with our previous  
432 framework (PASS-MP) (Fu et al., 2021; Zhang et al., 2017; Zhang et al., 2016b) and the new  
433 framework (PASCs-MP). The parameter settings for the two sparse coding methods are the  
434 same. Additionally, we apply the popular SPHARM method (Chung et al., 2008; Shi et al.,

435 2013a) to calculate hippocampal shape features. Based on these three kinds of feature sets, we  
 436 apply the random forest classifier to detect individuals with different A $\beta$  status. Moreover, we  
 437 also examine the classification performances using hippocampal MMS, surface area and  
 438 volume measures. These classification performances are evaluated using ACC, B-ACC, SPE,

439 **Table 2.** Classification Results for four contrasts.

| Area     | A $\beta$ + AD vs.<br>A $\beta$ - CU | A $\beta$ + MCI vs.<br>A $\beta$ - MCI | A $\beta$ + CU vs. A $\beta$ - CU<br>(ADNI) | A $\beta$ + CU vs. A $\beta$ - CU<br>(OASIS) |
|----------|--------------------------------------|----------------------------------------|---------------------------------------------|----------------------------------------------|
| ACC      | 0.68±0.01                            | 0.55±0.02                              | 0.54±0.01                                   | 0.47                                         |
| B-ACC    | 0.69±0.02                            | 0.55±0.02                              | 0.54±0.02                                   | 0.43                                         |
| SPE      | 0.66±0.02                            | 0.54±0.02                              | 0.55±0.02                                   | 0.49                                         |
| SEN      | 0.71±0.03                            | 0.56±0.03                              | 0.53±0.04                                   | 0.37                                         |
| Volume   | A $\beta$ + AD vs.<br>A $\beta$ - CU | A $\beta$ + MCI vs.<br>A $\beta$ - MCI | A $\beta$ + CU vs. A $\beta$ - CU<br>(ADNI) | A $\beta$ + CU vs. A $\beta$ - CU<br>(OASIS) |
| ACC      | 0.71±0.01                            | 0.53±0.02                              | 0.50±0.03                                   | 0.51                                         |
| B-ACC    | 0.72±0.01                            | 0.53±0.01                              | 0.50±0.03                                   | 0.52                                         |
| SPE      | 0.68±0.01                            | 0.52±0.01                              | 0.51±0.02                                   | 0.54                                         |
| SEN      | 0.75±0.01                            | 0.54±0.02                              | 0.49±0.04                                   | 0.50                                         |
| SPHARM   | A $\beta$ + AD vs.<br>A $\beta$ - CU | A $\beta$ + MCI vs.<br>A $\beta$ - MCI | A $\beta$ + CU vs. A $\beta$ - CU<br>(ADNI) | A $\beta$ + CU vs. A $\beta$ - CU<br>(OASIS) |
| ACC      | 0.71±0.02                            | 0.56±0.02                              | 0.52±0.02                                   | 0.60                                         |
| B-ACC    | 0.71±0.02                            | 0.56±0.03                              | 0.51±0.04                                   | 0.60                                         |
| SPE      | 0.74±0.02                            | 0.61±0.03                              | 0.56±0.03                                   | 0.61                                         |
| SEN      | 0.68±0.04                            | 0.51±0.03                              | 0.46±0.05                                   | 0.60                                         |
| PASS-MP  | A $\beta$ + AD vs.<br>A $\beta$ - CU | A $\beta$ + MCI vs.<br>A $\beta$ - MCI | A $\beta$ + CU vs. A $\beta$ - CU<br>(ADNI) | A $\beta$ + CU vs. A $\beta$ - CU<br>(OASIS) |
| ACC      | 0.79±0.01                            | 0.73±0.02                              | 0.71±0.02                                   | 0.74                                         |
| B-ACC    | 0.79±0.01                            | 0.73±0.02                              | 0.70±0.03                                   | 0.73                                         |
| SPE      | 0.78±0.02                            | 0.75±0.02                              | 0.73±0.03                                   | 0.74                                         |
| SEN      | 0.79±0.01                            | 0.72±0.03                              | 0.67±0.03                                   | 0.73                                         |
| PASCS-MP | A $\beta$ + AD vs.<br>A $\beta$ - CU | A $\beta$ + MCI vs.<br>A $\beta$ - MCI | A $\beta$ + CU vs. A $\beta$ - CU<br>(ADNI) | A $\beta$ + CU vs. A $\beta$ - CU<br>(OASIS) |
| ACC      | <b>0.91±0.01</b>                     | <b>0.89±0.01</b>                       | <b>0.79±0.02</b>                            | <b>0.81</b>                                  |
| B-ACC    | <b>0.91±0.01</b>                     | <b>0.89±0.01</b>                       | <b>0.79±0.03</b>                            | <b>0.80</b>                                  |
| SPE      | <b>0.91±0.01</b>                     | <b>0.91±0.01</b>                       | <b>0.80±0.02</b>                            | <b>0.82</b>                                  |
| SEN      | <b>0.90±0.01</b>                     | <b>0.88±0.01</b>                       | <b>0.79±0.05</b>                            | <b>0.79</b>                                  |

440 Values are mean ± 95% confident interval where applicable.

441 SEN. For each binary classification of ADNI cohort, we repeat the 10-fold cross-validation 5  
442 times; the mean and 95% confident interval of the evaluation measures are calculated as  
443 (Vanwinckelen and Blockeel, 2012) and shown in the middle three columns of **Table 2**. To  
444 further evaluate the performance of our new framework, we firstly generate new representations  
445 with our proposed PASCs-MP for all the CU subjects from ADNI and OASIS cohorts. Then,  
446 we train a binary random forest model on the ADNI dataset and test it with the OASIS dataset.  
447 Since there is no cross-validation here, there is no confident interval in the last column of **Table**  
448 **2**. We also compute the area-under-the-curve (AUC) of the receiver operating characteristic  
449 (ROC). The ROC curve and AUC for these classification tasks are illustrated in **Fig. 4**. This  
450 comparison analysis classification performance shows that the combination of PASCs-MP and  
451 hippocampal MMS measures have superior performance when detecting individuals with  
452 different  $A\beta$  status, compared to other similar methods.

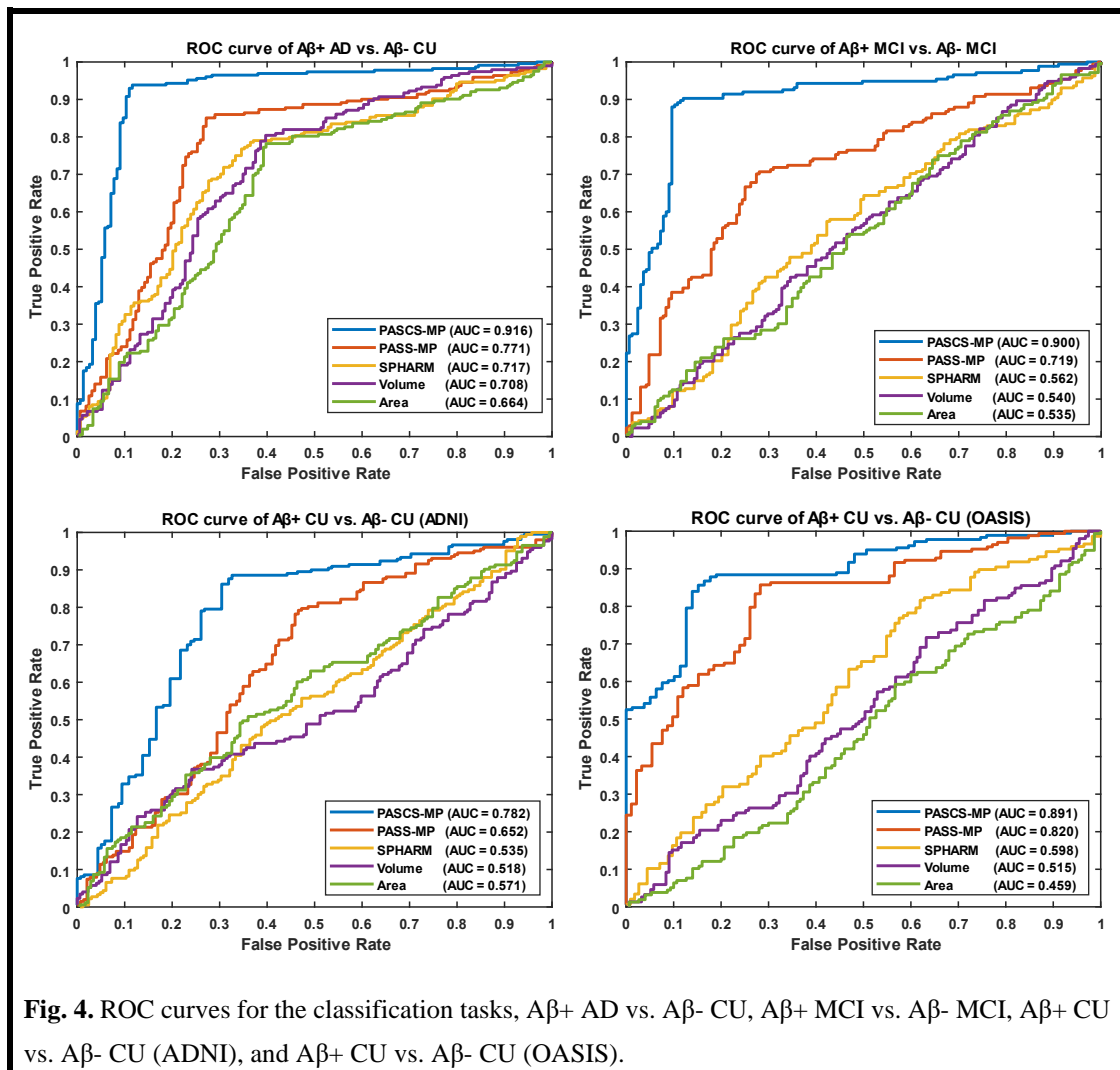

**Fig. 4.** ROC curves for the classification tasks,  $A\beta+$  AD vs.  $A\beta-$  CU,  $A\beta+$  MCI vs.  $A\beta-$  MCI,  $A\beta+$  CU vs.  $A\beta-$  CU (ADNI), and  $A\beta+$  CU vs.  $A\beta-$  CU (OASIS).

## 453 **4. DISCUSSION**

454 In this paper, we propose a novel surface feature dimension reduction scheme, PASCs-MP,  
455 to correlate the hippocampus MMS with different levels of A $\beta$  burden in individual subjects.  
456 We develop a hippocampal structure-based A $\beta$  burden prediction system that involves  
457 hippocampal MMS computing, sparse coding and classification modules. We apply the  
458 proposed system on two independent datasets, ADNI and OASIS. We have two main findings.  
459 Firstly, the hippocampal surface-based MMS measure practically encodes a great deal of  
460 neighboring intrinsic geometry information that would otherwise be inaccessible or overlooked  
461 in classical hippocampal volume and surface area measures. Experimental results show that the  
462 MMS measure provides better classification accuracy than hippocampal volume, surface area  
463 measures and SPHARM for detecting the relationships between hippocampal deformations and  
464 A $\beta$  positivity. Secondly, we propose a novel sparse coding method, PASCs-MP. It has all the  
465 advantages of our previous proposed PASS-MP (Zhang et al., 2016b, 2016a) and improves the  
466 follow-up classification performance compared to PASS-MP.

### 467 **4.1 Comparison Analysis of Hippocampal MMS, Volume and Surface Area**

468 The hippocampus is a primary target region for studying early AD progression. Its structure  
469 can be measured using the widely used overall hippocampal volume, surface area and our  
470 proposed hippocampal MMS. Our prior studies (Dong et al., 2019; Li et al., 2016; Shi et al.,  
471 2011; Wang et al., 2011) show that hippocampal MMS performs robustly in distinguishing  
472 clinical groups at different AD risk levels. In particular, we previously found that hippocampal  
473 MMS can detect *APOE4* gene dose effects on the hippocampus during the preclinical stage,  
474 while the hippocampal volume measure cannot (Dong et al., 2019). A study by Wu et al. (2018)  
475 demonstrates that hippocampal MMS performs better than traditional hippocampal volume  
476 measures in classifying 151 A $\beta$ + AD and 271 A $\beta$ - CU subjects.

477 This work evaluates the performance of the above three hippocampal measurements for  
478 predicting A $\beta$  status at the individual subject level. Classification results (see **Table 2** and **Fig.**  
479 **4**) show that hippocampal MMS has better performance as measured by ACC, SPE, SEN and

480 AUC. These results validate our hypothesis that hippocampal MMS-based analysis methods  
481 provide improved statistical accuracy than hippocampal volume and surface area measures in  
482 predicting the subjects with different A $\beta$  status in the AD continuum. Our prior work (Wang et  
483 al., 2011) shows that MMS may offer a surrogate biomarker for PET/CSF A $\beta$  biomarkers. This  
484 work further shows it can be used to classify brain A $\beta$  burden on an individual basis.

#### 485 **4.2 Comparative Analysis of PASCs-MP, PASS-MP and SPHARM**

486 The MMS measure for brain structures performs well in clinical group comparisons (Dong  
487 et al., 2020b, 2019; Li et al., 2016; Shi et al., 2015, 2014b; Wang et al., 2013; Yao et al., 2018),  
488 and as we have shown, it has the potential to further be applied for individual A $\beta$  classification.  
489 To achieve this goal, we need to solve the challenge that the MMS dimension is usually much  
490 larger than the number of subjects, i.e., the so-called *high dimension, small sample size problem*.  
491 A reasonable solution is to reduce the feature dimension. Existing feature dimension reduction  
492 approaches include feature selection (Fan et al., 2005; Jain and Zongker, 1997), feature  
493 extraction (Guyon et al., 2008; Jolliffe, 2002; Mika et al., 1999) and sparse learning methods  
494 (Donoho, 2006; Vounou et al., 2010; Wang et al., 2013). In most cases, information is lost when  
495 mapping data into a lower-dimensional space. By defining a better lower-dimensional subspace,  
496 this information loss can be limited. Sparse coding (Lee et al., 2007; Mairal et al., 2009) has  
497 been previously proposed to learn an over-complete set of basis vectors (also called a *dictionary*)  
498 to represent input vectors efficiently and concisely (Donoho and Elad, 2003). Sparse coding  
499 has been shown to be effective for many tasks such as image imprinting (Moody et al., 2012),  
500 image deblurring (Yin et al., 2008), super-resolution (Yang et al., 2008), classification (Mairal  
501 et al., 2009), functional brain connectivity (Lv et al., 2017, 2015), and structural morphometry  
502 analysis (Zhang et al., 2017).

503 Our previous studies (Zhang et al., 2017; Zhang et al., 2016b, 2016a) propose a patch  
504 analysis-based surface sparse-coding and max-pooling (PASS-MP) method, consisting of  
505 sparse coding (Lee et al., 2006; Mairal et al., 2009) and max-pooling (LeCun et al., 2015), for  
506 surface feature dimension reduction. PASS-MP has excellent impressive performance for the

507 sparse coding of our MMS features. Our prior studies successfully apply these sparse codes in  
508 detecting individual brain structure abnormalities and obtain state-of-art performance (Dong et  
509 al., 2020a; Fu et al., 2021; Wu et al., 2018).

510 Even so, there typically exists non-Gaussian and localized sources of noise in surface-based  
511 morphometry features, this can dramatically influence the learned dictionary and further lead  
512 to poor sparse coding based on the loss function of PASS-MP. The correntropy measure is a  
513 very robust method for correcting such sources of noise (He et al., 2012; Liu et al., 2007;  
514 Nikolova and Ng, 2006). In this paper, we improve upon the PASS-MP method by introducing  
515 correntropy measures into the loss function (Gui et al., 2017). Therefore, our proposed sparse  
516 coding method, PASCs-MP, incorporates all the advantages of PASS-MP and meanwhile  
517 improves the classification performance. We also test SPHARM-based hippocampal shape  
518 features as they have frequently been studied in prior AD research (e.g., (Cuingnet et al., 2011;  
519 Gerardin et al., 2009; Gutman et al., 2013)). In such an approach, we use a series of spherical  
520 harmonics to model the shapes of the hippocampus segmented by FSL. The SPHARM  
521 coefficients are computed using SPHARM-PDM (Spherical Harmonics-Point Distribution  
522 Model) software developed by the University of North Carolina and the National Alliance for  
523 Medical Imaging Computing (Styner et al., 2006). The classification features are based on  
524 these SPHARM coefficients, which are represented by two sets of three-dimensional SPHARM  
525 coefficients for each subject (in fact, one set for the hippocampus in each brain hemisphere). In  
526 Gerardin et al. (2009), they use a feature selection step because the subject groups are much  
527 smaller (fewer than 30 subjects in each group). When the number of subjects is small, the  
528 classifier can be more sensitive to uninformative features. In the current study, the number of  
529 subjects is relatively large, so a feature selection step is less necessary and may increase the  
530 risk of overfitting. We adopt the same approach in Cuingnet et al. (2011), who chose to avoid  
531 this selection step. The classification results (see **Table 2** and **Fig. 4**) based on PASCs-MP,  
532 PASS-MP and SPHARM meet our expectation that the classification performances based on  
533 PASCs-MP have an apparent improvement measured by ACC, B-ACC, SPE, SEN and AUC.  
534



### 535 4.3 A $\beta$ Burden Prediction using MRI Biomarkers

536 A $\beta$  accumulation is a major feature of AD neuropathology (Brier et al., 2016; Cummings,  
537 2019). Detecting it early and accurately provides a potential opportunity for effective  
538 therapeutic interventions before the advanced stages of AD (Tosun et al., 2014). Compared to  
539 PET and CSF A $\beta$  measurement techniques, MRI is less expensive (than PET) and less invasive  
540 (than both PET and lumbar puncture). AD-related biomarker studies (Jack et al., 2018; Jack  
541 and Holtzman, 2013; Sperling et al., 2011b) have shown that abnormal brain A $\beta$  accumulation  
542 typically precedes detectable structural brain abnormalities. There is emerging literature using  
543 MRI biomarkers to predict brain A $\beta$  burden, and hippocampal structural measurement is one  
544 of the major predictors (Ansart et al., 2020; Pekkala et al., 2020; Tosun et al., 2016, 2014).  
545 Tosun et al. (2014) applied LASSO penalized logistic regression classifier to MRI-based voxel-  
546 wise anatomical shape variation measures and cerebral blood flow measures to predict A $\beta$   
547 positivity in 67 people with early MCI (34 A $\beta$ +); the classification accuracy was 83%. Ansart  
548 et al. (2020) applied LASSO feature selection and a random forest classifier to MRI- based  
549 cortical thickness and hippocampal volume measures to classify 596 people with MCI scanned  
550 as part of ADNI MCI (375 A $\beta$ +); the AUC was 0.80. Our proposed classification framework  
551 has a higher ACC=89% or AUC=0.90 than each of these two studies (Ansart et al., 2020; Tosun  
552 et al., 2014) for predicting A $\beta$  status in people with MCI. Of the studies predicting A $\beta$  positivity  
553 in CUs, Ansart et al. (2020) applied LASSO feature selection and random forest classifier to  
554 MRI-derived cortical thickness and hippocampal volume measures to classify 431 ADNI CUs  
555 (162 A $\beta$ +) and 318 INSIGHT CUs (88 A $\beta$ +); the AUCs were 0.59 and 0.62, respectively.  
556 Pekkala et al. (2020) used the Disease State Index machine learning algorithm and MRI-based  
557 biomarkers (total cortical and gray matter volumes, hippocampus, accumbens, thalamus and  
558 putament volumes) to predict A $\beta$  burden in 48 CUs (20 A $\beta$ +); the AUC was 0.78. Our proposed  
559 classification framework has AUC=0.78 on 348 ADNI CUs (116 A $\beta$ +) and AUC=0.89 on 260  
560 OASIS CUs (52 A $\beta$ +). **Table 3** and **Fig. 4** present the AUC or ACC values from this work and  
561 from similar studies predicting A $\beta$  positivity using brain MRI biomarkers. Compared to these  
562 similar studies, our proposed classification system only uses hippocampal structural features

563 but still consistently outperforms other recently published methods for predicting A $\beta$  positivity  
 564 in people with MCI and CUs.

565 **Table 3.** Studies to impute A $\beta$  status from MRI biomarkers in key clinical groups in AD research.

| Method                                                                        | Subjects (A $\beta$ +/-)                                                   | MRI Biomarkers                                                                                                                                | ACC                                        | AUC                  |
|-------------------------------------------------------------------------------|----------------------------------------------------------------------------|-----------------------------------------------------------------------------------------------------------------------------------------------|--------------------------------------------|----------------------|
| PASCS-MP-Random forest classifier<br>(This work)                              | 342 ADNI MCI (171/171)<br>348 ADNI CU (116/232)<br>260 OASIS CU (52/208)   | Hippocampal multivariate morphometry statistics (MMS)                                                                                         | 0.89 $\pm$ 0.01<br>0.79 $\pm$ 0.02<br>0.81 | 0.90<br>0.78<br>0.89 |
| LASSO penalized logistic regression classifier<br>(Tosun et al., 2014)        | 67 Early MCI (34/33)                                                       | Voxel-wise anatomical shape variation measures and cerebral blood flow (including frontoparietal cortical, hippocampal regions, among others) | 0.83 $\pm$ 0.03                            |                      |
| LASSO feature selection and Random Forest classifier<br>(Ansart et al., 2020) | 596 ADNI MCI (375/221)<br>431 ADNI CU (162/269)<br>318 INSIGHT CU (88/230) | Cortical thickness and hippocampal volume                                                                                                     |                                            | 0.80<br>0.59<br>0.62 |
| Disease State Index machine learning algorithm<br>(Pekkala et al., 2020)      | 48 CU (20/28)                                                              | Total cortical and gray matter volumes, hippocampus, accumbens, thalamus and putamen volumes                                                  |                                            | 0.78                 |

#### 566 4.4 Limitations and Future Work

567 Despite the promising results are obtained by applying our proposed A $\beta$  positivity  
 568 classification framework, there are two important caveats. First, when applying the PASCS-  
 569 MP method to refine MMS, we generally cannot visualize the selected features. To some extent,  
 570 this decreases the interpretability of the effects, although it is still possible to visualize  
 571 statistically significant regions as in our prior group difference studies (Shi et al., 2013b; Wang  
 572 et al., 2013). However, in our recent work (Zhang et al., 2018), instead of randomly selecting

573 patches to build the initial dictionary, we use group lasso screening to select the most significant  
574 features first. Therefore, the features used in sparse coding may be visualized on the surface  
575 map. In the future, we will incorporate this idea into the PASCs-MP framework to make it  
576 more interpretable. Second, this work only applies hippocampal MMS to predict A $\beta$  positivity.  
577 In future work, we plan to introduce more AD risk factors (such as demographic information,  
578 genetic information and clinical assessments) (Ansart et al., 2020; Pekkala et al., 2020; Tosun  
579 et al., 2014), and more AD regions of interest (ROIs, e.g., ventricles, entorhinal cortex, temporal  
580 lobes) (Brier et al., 2016; Dong et al., 2020b; Foley et al., 2017) into our proposed framework;  
581 these additional features are expected to improve the A $\beta$  positivity prediction.

## 582 **5. CONCLUSION**

583 In this paper, we explore the association between hippocampal structures and A $\beta$  positivity  
584 on two independent databases using our hippocampal MMS, PASCs-MP method and a random  
585 forest classifier. Compared to traditional hippocampal shape measures, MMS have superior  
586 performance for predicting A $\beta$  positivity in the AD continuum. Besides, the proposed PASCs-  
587 MP outperforms our previous sparse coding method (PASS-MP) on refining MMS features.  
588 Compared to similar studies, this work achieves state-of-the-art performance when predicting  
589 A $\beta$  positivity based on MRI biomarkers. In future, we plan to apply this proposed framework  
590 to other AD ROIs and further improve the comprehensibility of the framework by visualizing  
591 morphometry features selected in the classification.

## 592 **ACKNOWLEDGMENTS**

593 Algorithm development and image analysis for this study were partially supported by the  
594 National Institute on Aging (RF1AG051710, R21AG065942, R01AG031581 and  
595 P30AG19610), the National Library of Medicine, National Cancer Institute, the National  
596 Institute for Biomedical Imaging and Bioengineering (R01EB025032), and the Arizona  
597 Alzheimer Consortium.

598 Data collection and sharing for this project was funded by the Alzheimer's Disease  
599 Neuroimaging Initiative (ADNI) (National Institutes of Health Grant U01 AG024904) and DoD

600 ADNI (Department of Defense award number W81XWH-12-2-0012). ADNI is funded by the  
601 National Institute on Aging, the National Institute of Biomedical Imaging and Bioengineering,  
602 and through generous contributions from the following: Alzheimer’s Association; Alzheimer’s  
603 Drug Discovery Foundation; BioClinica, Inc.; Biogen Idec Inc.; Bristol-Myers Squibb  
604 Company; Eisai Inc.; Elan Pharmaceuticals, Inc.; Eli Lilly and Company; F. Hoffmann-La  
605 Roche Ltd and its affiliated company Genentech, Inc.; GE Healthcare; Innogenetics, N.V.;  
606 IXICO Ltd.; Janssen Alzheimer Immunotherapy Research & Development, LLC.; Johnson &  
607 Johnson Pharmaceutical Research & Development LLC.; Medpace, Inc.; Merck & Co., Inc.;  
608 Meso Scale Diagnostics, LLC.; NeuroRx Research; Novartis Pharmaceuticals Corporation;  
609 Pfizer Inc.; Piramal Imaging; Servier; Synarc Inc.; and Takeda Pharmaceutical Company. The  
610 Canadian Institutes of Health Research is providing funds to support ADNI clinical sites in  
611 Canada. Private sector contributions are facilitated by the Foundation for the National Institutes  
612 of Health ([www.fnih.org](http://www.fnih.org)). The grantee organization is the Northern California Institute for  
613 Research and Education, and the study is coordinated by the Alzheimer's Disease Cooperative  
614 Study at the University of California, San Diego. ADNI data are disseminated by the Laboratory  
615 for Neuro Imaging at the University of Southern California.

## 616 REFERENCES

- 617 Ansart, M., Epelbaum, S., Gagliardi, G., Colliot, O., Dormont, D., Dubois, B., Hampel, H.,  
618 Durrleman, S., 2020. Reduction of recruitment costs in preclinical AD trials: validation  
619 of automatic pre-screening algorithm for brain amyloidosis. *Stat. Methods Med. Res.* 29,  
620 151–164. <https://doi.org/10.1177/0962280218823036>
- 621 Apostolova, L.G., Morra, J.H., Green, A.E., Hwang, K.S., Avedissian, C., Woo, E., Cummings,  
622 J.L., Toga, A.W., Jack Jr., C.R., Weiner, M.W., Thompson, P.M., 2010. Automated 3D  
623 mapping of baseline and 12-month associations between three verbal memory measures  
624 and hippocampal atrophy in 490 ADNI subjects. *Neuroimage* 51, 488–499.  
625 <https://doi.org/10.1016/j.neuroimage.2009.12.125>
- 626 Bateman, R.J., Blennow, K., Doody, R., Hendrix, S., Lovestone, S., Salloway, S., Schindler,

- 627 R., Weiner, M., Zetterberg, H., Aisen, P., Vellas, B., 2019. Plasma Biomarkers of AD  
628 Emerging as Essential Tools for Drug Development: An EU/US CTAD Task Force  
629 Report. *J. Prev. Alzheimer's Dis.* 6, 169–173. <https://doi.org/10.14283/jpad.2019.21>
- 630 Bhagwat, N., Viviano, J.D., Voineskos, A.N., Chakravarty, M.M., 2018. Modeling and  
631 prediction of clinical symptom trajectories in Alzheimer's disease using longitudinal data.  
632 *PLoS Comput. Biol.* 14, 1–25. <https://doi.org/10.1371/journal.pcbi.1006376>
- 633 Boureau, Y.L., Ponce, J., Lecun, Y., 2010. A theoretical analysis of feature pooling in visual  
634 recognition, in: *ICML 2010 - Proceedings, 27th International Conference on Machine*  
635 *Learning.*
- 636 Brier, M.R., Gordon, B., Friedrichsen, K., McCarthy, J., Stern, A., Christensen, J., Owen, C.,  
637 Aldea, P., Su, Y., Hassenstab, J., Cairns, N.J., Holtzman, D.M., Fagan, A.M., Morris, J.C.,  
638 Benzinger, T.L.S., Ances, B.M., 2016. Tau and Ab imaging, CSF measures, and cognition  
639 in Alzheimer's disease. *Sci. Transl. Med.* 8, 1–10.  
640 <https://doi.org/10.1126/scitranslmed.aaf2362>
- 641 Bro-Nielsen, M., Gramkow, C., 1996. Fast fluid registration of medical images, in: *Lecture*  
642 *Notes in Computer Science (Including Subseries Lecture Notes in Artificial Intelligence*  
643 *and Lecture Notes in Bioinformatics).* <https://doi.org/10.1007/bfb0046964>
- 644 Brookmeyer, R., Johnson, E., Ziegler-Graham, K., Arrighi, H.M., 2007. Forecasting the global  
645 burden of Alzheimer's disease. *Alzheimer's Dement.* 3, 186–191.  
646 <https://doi.org/10.1016/j.jalz.2007.04.381>
- 647 Cacciaglia, R., Molinuevo, J.L., Falcón, C., Brugulat-Serrat, A., Sánchez-Benavides, G.,  
648 Gramunt, N., Esteller, M., Morán, S., Minguillón, C., Fauria, K., Gispert, J.D., 2018.  
649 Effects of APOE -ε4 allele load on brain morphology in a cohort of middle-aged healthy  
650 individuals with enriched genetic risk for Alzheimer's disease. *Alzheimer's Dement.* 14,  
651 902–912. <https://doi.org/10.1016/j.jalz.2018.01.016>
- 652 Ching, C.R.K., Abaryan, Z., Santhalingam, V., Zhu, A.H., Bright, J.K., Jahanshad, N.,  
653 Thompson, P.M., 2020. Sex-Dependent Age Trajectories of Subcortical Brain Structures:

- 654 Analysis of Large-Scale Percentile Models and Shape Morphometry. bioRxiv  
655 2020.09.30.321711. <https://doi.org/10.1101/2020.09.30.321711>
- 656 Chung, M.K., Dalton, K.M., Davidson, R.J., 2008. Tensor-based cortical surface morphometry  
657 via weighted spherical harmonic representation. *IEEE Trans. Med. Imaging*.  
658 <https://doi.org/10.1109/TMI.2008.918338>
- 659 Chung, M.K., Dalton, K.M., Shen, L., Evans, A.C., Davidson, R.J., 2007. Weighted Fourier  
660 Series Representation and Its Application to Quantifying the Amount of Gray Matter.  
661 *IEEE Trans. Med. Imaging* 26, 566–581. <https://doi.org/10.1109/TMI.2007.892519>
- 662 Colom, R., Stein, J.L., Rajagopalan, P., Martínez, K., Hermel, D., Wang, Y., Álvarez-Linera,  
663 J., Burgaleta, M., Quiroga, M.Á., Shih, P.C., Thompson, P.M., 2013. Hippocampal  
664 structure and human cognition: Key role of spatial processing and evidence supporting  
665 the efficiency hypothesis in females. *Intelligence*.  
666 <https://doi.org/10.1016/j.intell.2013.01.002>
- 667 Costafreda, S.G., Dinov, I.D., Tu, Z., Shi, Y., Liu, C.-Y., Kloszewska, I., Mecocci, P., Soininen,  
668 H., Tsolaki, M., Vellas, B., others, 2011. Automated hippocampal shape analysis predicts  
669 the onset of dementia in mild cognitive impairment. *Neuroimage* 56, 212–219.
- 670 Crivello, F., Lemaître, H., Dufouil, C., Grassiot, B., Delcroix, N., Tzourio-Mazoyer, N.,  
671 Tzourio, C., Mazoyer, B., 2010. Effects of ApoE- $\epsilon$ 4 allele load and age on the rates of  
672 grey matter and hippocampal volumes loss in a longitudinal cohort of 1186 healthy elderly  
673 persons. *Neuroimage* 53, 1064–1069. <https://doi.org/10.1016/j.neuroimage.2009.12.116>
- 674 Cuingnet, R., Gerardin, E., Tessieras, J., Auzias, G., Lehericy, S., Habert, M.O., Chupin, M.,  
675 Benali, H., Colliot, O., 2011. Automatic classification of patients with Alzheimer’s  
676 disease from structural MRI: A comparison of ten methods using the ADNI database.  
677 *Neuroimage* 56, 766–781. <https://doi.org/10.1016/j.neuroimage.2010.06.013>
- 678 Cummings, J., 2019. The National Institute on Aging—Alzheimer’s Association Framework  
679 on Alzheimer’s disease: Application to clinical trials. *Alzheimer’s Dement.* 15, 172–178.  
680 <https://doi.org/10.1016/j.jalz.2018.05.006>

- 681 D'Agostino, E., Maes, F., Vandermeulen, D., Suetens, P., 2003. A viscous fluid model for  
682 multimodal non-rigid image registration using mutual information. *Med. Image Anal.*  
683 [https://doi.org/10.1016/S1361-8415\(03\)00039-2](https://doi.org/10.1016/S1361-8415(03)00039-2)
- 684 Davatzikos, C., Resnick, S.M., Wu, X., Pampi, P., Clark, C.M., 2008. Individual patient  
685 diagnosis of AD and FTD via high-dimensional pattern classification of MRI.  
686 *Neuroimage*. <https://doi.org/10.1016/j.neuroimage.2008.03.050>
- 687 Dong, Q., Zhang, J., Li, Q., Wang, J., Leporé, N., Thompson, P.M., Caselli, R.J., Ye, J., Wang,  
688 Y., 2020a. Integrating Convolutional Neural Networks and Multi-Task Dictionary  
689 Learning for Cognitive Decline Prediction with Longitudinal Images. *J. Alzheimers. Dis.*  
690 <https://doi.org/10.3233/JAD-190973>
- 691 Dong, Q., Zhang, W., Stonnington, C.M., Wu, J., Gutman, B.A., Chen, K., Su, Y., Baxter, L.C.,  
692 Thompson, P.M., Reiman, E.M., Caselli, R.J., Wang, Y., 2020b. Applying surface-based  
693 morphometry to study ventricular abnormalities of cognitively unimpaired subjects prior  
694 to clinically significant memory decline. *NeuroImage Clin.* 27.  
695 <https://doi.org/10.1016/j.nicl.2020.102338>
- 696 Dong, Q., Zhang, W., Wu, J., Li, B., Schron, E.H., McMahon, T., Shi, J., Gutman, B.A., Chen,  
697 K., Baxter, L.C., Thompson, P.M., Reiman, E.M., Caselli, R.J., Wang, Y., 2019. Applying  
698 surface-based hippocampal morphometry to study APOE-E4 allele dose effects in  
699 cognitively unimpaired subjects. *NeuroImage Clin.*  
700 <https://doi.org/10.1016/j.nicl.2019.101744>
- 701 Donoho, D.L., 2006. Compressed sensing. *IEEE Trans. Inf. Theory*.  
702 <https://doi.org/10.1109/TIT.2006.871582>
- 703 Donoho, D.L., Elad, M., 2003. Optimally sparse representation in general (nonorthogonal)  
704 dictionaries via  $l_1$  minimization. *Proc. Natl. Acad. Sci.* 100, 2197–2202.
- 705 Dubey, R., Zhou, J., Wang, Y., Thompson, P.M., Ye, J., 2014. Analysis of sampling techniques  
706 for imbalanced data: An  $n=648$  ADNI study. *Neuroimage* 87, 220–241.  
707 <https://doi.org/10.1016/j.neuroimage.2013.10.005>

- 708 Fan, Y., Resnick, S.M., Wu, X., Davatzikos, C., 2008. Structural and functional biomarkers of  
709 prodromal Alzheimer's disease: A high-dimensional pattern classification study.  
710 *Neuroimage* 41, 277–285. <https://doi.org/10.1016/j.neuroimage.2008.02.043>
- 711 Fan, Y., Shen, D., Davatzikos, C., 2005. Classification of structural images via high-  
712 dimensional image warping, robust feature extraction, and SVM. *Med Image*  
713 *Comput Comput Assist Interv* 8, 1–8.
- 714 Feng, Y., Huang, X., Shi, L., Yang, Y., Suykens, J.A.K., 2015. Learning with the maximum  
715 correntropy criterion induced losses for regression. *J. Mach. Learn. Res.* 16, 993–1034.
- 716 Fleisher, A.S., Chen, K., Liu, X., Rontiva, A., Thiyyagura, P., Ayutyanont, N., Joshi, A.D.,  
717 Clark, C.M., Mintun, M.A., Pontecorvo, M.J., Doraiswamy, P.M., Johnson, K.A.,  
718 Skovronsky, D.M., Reiman, E.M., 2011. Using positron emission tomography and  
719 florbetapir F 18 to image cortical amyloid in patients with mild cognitive impairment or  
720 dementia due to Alzheimer disease. *Arch. Neurol.*  
721 <https://doi.org/10.1001/archneurol.2011.150>
- 722 Foley, S.F., Tansey, K.E., Caseras, X., Lancaster, T., Bracht, T., Parker, G., Hall, J., Williams,  
723 J., Linden, D.E., 2017. Multimodal Brain Imaging Reveals Structural Differences in  
724 Alzheimer's Disease Polygenic Risk Carriers: A Study in Healthy Young Adults. *Biol*  
725 *Psychiatry* 81, 154–161. <https://doi.org/10.1016/j.biopsych.2016.02.033>
- 726 Folstein, M.F., Folstein, S.E., McHugh, P.R., 1975. "Mini-mental state". A practical method  
727 for grading the cognitive state of patients for the clinician. *J. Psychiatr. Res.*  
728 [https://doi.org/10.1016/0022-3956\(75\)90026-6](https://doi.org/10.1016/0022-3956(75)90026-6)
- 729 Fu, W.J., 1998. Penalized regressions: The bridge versus the lasso? *J. Comput. Graph. Stat.*  
730 <https://doi.org/10.1080/10618600.1998.10474784>
- 731 Fu, Y., Zhang, J., Li, Yuan, Shi, J., Zou, Y., Guo, H., Li, Yongchao, Yao, Z., Wang, Y., Hu,  
732 B., 2021. A novel pipeline leveraging surface-based features of small subcortical  
733 structures to classify individuals with autism spectrum disorder. *Prog. Neuro-*  
734 *Psychopharmacology Biol. Psychiatry* 104, 109989.



- 735 <https://doi.org/10.1016/j.pnpbp.2020.109989>
- 736 Gerardin, E., Chételat, G., Chupin, M., Cuingnet, R., Desgranges, B., Kim, H.-S., Niethammer,  
737 M., Dubois, B., Lehéricy, S., Garnero, L., Eustache, F., Colliot, O., 2009.  
738 Multidimensional classification of hippocampal shape features discriminates Alzheimer's  
739 disease and mild cognitive impairment from normal aging. *Neuroimage* 47, 1476–1486.  
740 <https://doi.org/10.1016/j.neuroimage.2009.05.036>
- 741 Gui, J., Sun, Z., Ji, S., Tao, D., Tan, T., 2017. Feature selection based on structured sparsity: a  
742 comprehensive study. *IEEE Trans. Neural Networks Learn. Syst.*  
743 <https://doi.org/10.1109/TNNLS.2016.2551724>
- 744 Gutman, B.A., Hua, X., Rajagopalan, P., Chou, Y.Y., Wang, Y., Yanovsky, I., Toga, A.W.,  
745 Jack, C.R., Weiner, M.W., Thompson, P.M., 2013. Maximizing power to track  
746 Alzheimer's disease and MCI progression by LDA-based weighting of longitudinal  
747 ventricular surface features. *Neuroimage* 70, 386–401.  
748 <https://doi.org/10.1016/j.neuroimage.2012.12.052>
- 749 Guyon, I., Gunn, S., Nikravesh, M., Zadeh, L.A., 2008. Feature extraction: foundations and  
750 applications. Springer.
- 751 Han, X., Xu, C., Prince, J.L., 2003. A topology preserving level set method for geometric  
752 deformable models. *IEEE Trans. Pattern Anal. Mach. Intell.*  
753 <https://doi.org/10.1109/TPAMI.2003.1201824>
- 754 Hardy, J., Selkoe, D.J., 2002. The amyloid hypothesis of Alzheimer's disease: progress and  
755 problems on the road to therapeutics. *Science* (80-. ). 297, 353–356.  
756 <https://doi.org/10.1126/science.1072994>
- 757 He, R., Tan, T., Wang, L., Zheng, W.S., 2012. L<sub>2,1</sub> regularized correntropy for robust feature  
758 selection, in: Proceedings of the IEEE Computer Society Conference on Computer Vision  
759 and Pattern Recognition. <https://doi.org/10.1109/CVPR.2012.6247966>
- 760 Hinrichs, C., Singh, V., Xu, G., Johnson, S.C., 2011. Predictive markers for AD in a multi-

- 761 modality framework: An analysis of MCI progression in the ADNI population.  
762 *Neuroimage* 55, 574–589. <https://doi.org/10.1016/j.neuroimage.2010.10.081>
- 763 Hoppe, H., 1996. Progressive meshes, in: Proceedings of the 23rd Annual Conference on  
764 Computer Graphics and Interactive Techniques, SIGGRAPH 1996.  
765 <https://doi.org/10.1145/237170.237216>
- 766 Hyman, B.T., 2011. Amyloid-dependent and amyloid-independent stages of alzheimer disease.  
767 *Arch. Neurol.* <https://doi.org/10.1001/archneurol.2011.70>
- 768 Jack, C.R., Bennett, D.A., Blennow, K., Carrillo, M.C., Dunn, B., Haeberlein, S.B., Holtzman,  
769 D.M., Jagust, W., Jessen, F., Karlawish, J., Liu, E., Molinuevo, J.L., Montine, T., Phelps,  
770 C., Rankin, K.P., Rowe, C.C., Scheltens, P., Siemers, E., Snyder, H.M., Sperling, R.,  
771 Elliott, C., Masliah, E., Ryan, L., Silverberg, N., 2018. NIA-AA Research Framework:  
772 Toward a biological definition of Alzheimer’s disease. *Alzheimer’s Dement.* 14, 535–  
773 562. <https://doi.org/10.1016/j.jalz.2018.02.018>
- 774 Jack, C.R., Bennett, D.A., Blennow, K., Carrillo, M.C., Feldman, H.H., Frisoni, G.B., Hampel,  
775 H., Jagust, W.J., Johnson, K.A., Knopman, D.S., Petersen, R.C., Scheltens, P., Sperling,  
776 R.A., Dubois, B., 2016. A/T/N: An unbiased descriptive classification scheme for  
777 Alzheimer disease biomarkers. *Neurology* 87, 539–547.  
778 <https://doi.org/10.1212/WNL.0000000000002923>
- 779 Jack, C.R., Holtzman, D.M., 2013. Biomarker modeling of alzheimer’s disease. *Neuron* 80,  
780 1347–1358. <https://doi.org/10.1016/j.neuron.2013.12.003>
- 781 Jain, A., Zongker, D., 1997. Feature selection: Evaluation, application, and small sample  
782 performance. *Pattern Anal. Mach. Intell. IEEE Trans.* 19, 153–158.
- 783 Janelidze, S., Mattsson, N., Palmqvist, S., Smith, R., Beach, T.G., Serrano, G.E., Chai, X.,  
784 Proctor, N.K., Eichenlaub, U., Zetterberg, H., Blennow, K., Reiman, E.M., Stomrud, E.,  
785 Dage, J.L., Hansson, O., 2020. Plasma P-tau181 in Alzheimer’s disease: relationship to  
786 other biomarkers, differential diagnosis, neuropathology and longitudinal progression to  
787 Alzheimer’s dementia. *Nat. Med.* 26, 379–386. <https://doi.org/10.1038/s41591-020->

788 0755-1

789 Jianchao Yang, Wright, J., Huang, T., Yi Ma, 2008. Image super-resolution as sparse  
790 representation of raw image patches, in: 2008 IEEE Conference on Computer Vision and  
791 Pattern Recognition. IEEE, pp. 1–8. <https://doi.org/10.1109/CVPR.2008.4587647>

792 Jolliffe, I.T., 2002. Principal Component Analysis, Second Edition. *Encycl. Stat. Behav. Sci.*  
793 <https://doi.org/10.2307/1270093>

794 Kao, P.Y., Shailja, F., Jiang, J., Zhang, A., Khan, A., Chen, J.W., Manjunath, B.S., 2020.  
795 Improving Patch-Based Convolutional Neural Networks for MRI Brain Tumor  
796 Segmentation by Leveraging Location Information. *Front. Neurosci.*  
797 <https://doi.org/10.3389/fnins.2019.01449>

798 Klunk, W.E., Koeppe, R.A., Price, J.C., Benzinger, T.L., Devous, M.D., Jagust, W.J., Johnson,  
799 K.A., Mathis, C.A., Minhas, D., Pontecorvo, M.J., Rowe, C.C., Skovronsky, D.M.,  
800 Mintun, M.A., 2015. The Centiloid project: Standardizing quantitative amyloid plaque  
801 estimation by PET. *Alzheimer's Dement.* 11, 1-15.e4.  
802 <https://doi.org/10.1016/j.jalz.2014.07.003>

803 La Joie, R., Perrotin, A., De La Sayette, V., Egret, S., Dœuvre, L., Belliard, S., Eustache, F.,  
804 Desgranges, B., Chételat, G., 2013. Hippocampal subfield volumetry in mild cognitive  
805 impairment, Alzheimer's disease and semantic dementia. *NeuroImage Clin.*  
806 <https://doi.org/10.1016/j.nicl.2013.08.007>

807 Lee, H., Battle, A., Raina, R., Ng, A.Y., 2007. Efficient sparse coding algorithms, in: *Advances*  
808 *in Neural Information Processing Systems.*  
809 <https://doi.org/10.7551/mitpress/7503.003.0105>

810 Lee, Y.K., Hou, S.W., Lee, C.C., Hsu, C.Y., Huang, Y.S., Su, Y.C., 2013. Increased Risk of  
811 Dementia in Patients with Mild Traumatic Brain Injury: A Nationwide Cohort Study.  
812 *PLoS One.* <https://doi.org/10.1371/journal.pone.0062422>

813 Leow, A., Huang, S.C., Geng, A., Becker, J., Davis, S., Toga, A., Thompson, P., 2005. Inverse

- 814 consistent mapping in 3D deformable image registration: Its construction and statistical  
815 properties, in: Lecture Notes in Computer Science. [https://doi.org/10.1007/11505730\\_41](https://doi.org/10.1007/11505730_41)
- 816 Li, B., Shi, J., Gutman, B.A., Baxter, L.C., Thompson, P.M., Caselli, R.J., Wang, Y.,  
817 Neuroimaging Initiative, D., 2016. Influence of APOE Genotype on Hippocampal  
818 Atrophy over Time-An N=1925 Surface-Based ADNI Study.  
819 <https://doi.org/10.1371/journal.pone.0152901>
- 820 Liaw, A., Wiener, M., 2002. Classification and Regression by randomForest. R News.
- 821 Lin, B., Li, Q., Sun, Q., Lai, M.-J., Davidson, I., Fan, W., Ye, J., 2014. Stochastic Coordinate  
822 Coding and Its Application for Drosophila Gene Expression Pattern Annotation.
- 823 Liu, W., Pokharel, P.P., Principe, J.C., 2007. Correntropy: Properties and applications in non-  
824 Gaussian signal processing. IEEE Trans. Signal Process.  
825 <https://doi.org/10.1109/TSP.2007.896065>
- 826 Loop, C., 1987. Smooth Subdivision Surfaces Based on Triangles. Acm Siggraph.
- 827 Lorensen, W.E., Cline, H.E., 1987. Marching cubes: A high resolution 3D surface construction  
828 algorithm, in: Proceedings of the 14th Annual Conference on Computer Graphics and  
829 Interactive Techniques, SIGGRAPH 1987. <https://doi.org/10.1145/37401.37422>
- 830 Luders, E., Thompson, P.M., Kurth, F., Hong, J.Y., Phillips, O.R., Wang, Y., Gutman, B.A.,  
831 Chou, Y.Y., Narr, K.L., Toga, A.W., 2013. Global and regional alterations of  
832 hippocampal anatomy in long-term meditation practitioners. Hum. Brain Mapp.  
833 <https://doi.org/10.1002/hbm.22153>
- 834 Lv, J., Jiang, X., Li, X., Zhu, D., Zhang, S., Zhao, S., Chen, H., Zhang, T., Hu, X., Han, J., Ye,  
835 J., Guo, L., Liu, T., 2015. {H}olistic atlases of functional networks and interactions reveal  
836 reciprocal organizational architecture of cortical function. IEEE Trans Biomed Eng 62,  
837 1120–1131.
- 838 Lv, J., Lin, B., Li, Q., Zhang, W., Zhao, Y., Jiang, X., Guo, L., Han, J., Hu, X., Guo, C., Ye, J.,  
839 Liu, T., 2017. Task fMRI data analysis based on supervised stochastic coordinate coding.

- 840 Med. Image Anal. 38, 1–16. <https://doi.org/10.1016/j.media.2016.12.003>
- 841 Mairal, J., Bach, F., Ponce, J., Sapiro, G., 2009. Online dictionary learning for sparse coding,  
842 in: ACM International Conference Proceeding Series.  
843 <https://doi.org/10.1145/1553374.1553463>
- 844 Marcus, D.S., Fotenos, A.F., Csernansky, J.G., Morris, J.C., Buckner, R.L., 2010. Open Access  
845 Series of Imaging Studies: Longitudinal MRI Data in Nondemented and Demented Older  
846 Adults. *J. Cogn. Neurosci.* 22, 2677–2684. <https://doi.org/10.1162/jocn.2009.21407>
- 847 Mika, S., Ratsch, G., Weston, J., Scholkopf, B., Muller, K.R., 1999. Fisher discriminant  
848 analysis with kernels, in: *Neural Networks for Signal Processing - Proceedings of the*  
849 *IEEE Workshop*. <https://doi.org/10.1109/nnspp.1999.788121>
- 850 Monje, M., Thomason, M.E., Rigolo, L., Wang, Y., Waber, D.P., Sallan, S.E., Golby, A.J.,  
851 2013. Functional and structural differences in the hippocampus associated with memory  
852 deficits in adult survivors of acute lymphoblastic leukemia. *Pediatr. Blood Cancer*.  
853 <https://doi.org/10.1002/pbc.24263>
- 854 Moody, D.I., Brumby, S.P., Rowland, J.C., Gangodagamage, C., 2012. Unsupervised land  
855 cover classification in multispectral imagery with sparse representations on learned  
856 dictionaries, in: *Proceedings - Applied Imagery Pattern Recognition Workshop*.  
857 <https://doi.org/10.1109/AIPR.2012.6528190>
- 858 Morra, J.H., Tu, Z., Apostolova, L.G., Green, A.E., Avedissian, C., Madsen, S.K., Parikshak,  
859 N., Hua, X., Toga, A.W., Jack, C.R., Schuff, N., Weiner, M.W., Thompson, P.M., 2009.  
860 Automated 3D mapping of hippocampal atrophy and its clinical correlates in 400 subjects  
861 with Alzheimer’s disease, mild cognitive impairment, and elderly controls. *Hum. Brain*  
862 *Mapp.* 30, 2766–2788. <https://doi.org/10.1002/hbm.20708>
- 863 Mueller, S.G., Weiner, M.W., Thal, L.J., Petersen, R.C., Jack, C., Jagust, W., Trojanowski,  
864 J.Q., Toga, A.W., Beckett, L., 2005. The Alzheimer’s disease neuroimaging initiative.  
865 *Neuroimaging Clin. N. Am.* <https://doi.org/10.1016/j.nic.2005.09.008>

- 866 Nakamura, A., Kaneko, N., Villemagne, V.L., Kato, T., Doecke, J., Doré, V., Fowler, C., Li,  
867 Q.X., Martins, R., Rowe, C., Tomita, T., Matsuzaki, K., Ishii, Kenji, Ishii, Kazunari,  
868 Arahata, Y., Iwamoto, S., Ito, K., Tanaka, K., Masters, C.L., Yanagisawa, K., 2018. High  
869 performance plasma amyloid- $\beta$  biomarkers for Alzheimer's disease. *Nature* 554, 249–  
870 254. <https://doi.org/10.1038/nature25456>
- 871 Navitsky, M., Joshi, A.D., Kennedy, I., Klunk, W.E., Rowe, C.C., Wong, D.F., Pontecorvo,  
872 M.J., Mintun, M.A., Devous, M.D., 2018. Standardization of amyloid quantitation with  
873 florbetapir standardized uptake value ratios to the Centiloid scale. *Alzheimer's Dement.*  
874 <https://doi.org/10.1016/j.jalz.2018.06.1353>
- 875 Nikolova, M., Ng, M.K., 2006. Analysis of half-quadratic minimization methods for signal and  
876 image recovery. *SIAM J. Sci. Comput.* <https://doi.org/10.1137/030600862>
- 877 Olshausen, B.A., Field, D.J., 1997. Sparse coding with an overcomplete basis set: A strategy  
878 employed by V1? *Vision Res.* [https://doi.org/10.1016/S0042-6989\(97\)00169-7](https://doi.org/10.1016/S0042-6989(97)00169-7)
- 879 Palmqvist, S., Janelidze, S., Quiroz, Y.T., Zetterberg, H., Lopera, F., Stomrud, E., Su, Y., Chen,  
880 Y., Serrano, G.E., Leuzy, A., Mattsson-Carlgrén, N., Strandberg, O., Smith, R., Villegas,  
881 A., Sepulveda-Falla, D., Chai, X., Proctor, N.K., Beach, T.G., Blennow, K., Dage, J.L.,  
882 Reiman, E.M., Hansson, O., 2020. Discriminative Accuracy of Plasma Phospho-tau217  
883 for Alzheimer Disease vs Other Neurodegenerative Disorders. *JAMA* 324, 772.  
884 <https://doi.org/10.1001/jama.2020.12134>
- 885 Paquette, N., Shi, J., Wang, Y., Lao, Y., Ceschin, R., Nelson, M.D., Panigrahy, A., Lepore, N.,  
886 2017. Ventricular shape and relative position abnormalities in preterm neonates.  
887 *NeuroImage. Clin.* 15, 483–493. <https://doi.org/10.1016/j.nicl.2017.05.025>
- 888 Patenaude, B., Smith, S.M., Kennedy, D.N., Jenkinson, M., 2011. A Bayesian model of shape  
889 and appearance for subcortical brain segmentation. *Neuroimage.*  
890 <https://doi.org/10.1016/j.neuroimage.2011.02.046>
- 891 Pekkala, T., Hall, A., Ngandu, T., Gils, M. van, Helisalmi, S., Hänninen, T., Kempainen, N.,  
892 Liu, Y., Lötjönen, J., Paajanen, T., Rinne, J.O., Soininen, H., Kivipelto, M., Solomon, A.,

- 893 2020. Detecting Amyloid Positivity in Elderly With Increased Risk of Cognitive Decline.  
894 *Front. Aging Neurosci.* 12, 1–9. <https://doi.org/10.3389/fnagi.2020.00228>
- 895 Pizer, S.M., Fritsch, D.S., Yushkevich, P.A., Johnson, V.E., Chaney, E.L., 1999. Segmentation,  
896 registration, and measurement of shape variation via image object shape. *IEEE Trans.*  
897 *Med. Imaging.* <https://doi.org/10.1109/42.811263>
- 898 Qiu, A., Taylor, W.D., Zhao, Z., MacFall, J.R., Miller, M.I., Key, C.R., Payne, M.E., Steffens,  
899 D.C., Krishnan, K.R., 2009. APOE related hippocampal shape alteration in geriatric  
900 depression. *Neuroimage* 44, 620–626. [https://doi.org/S1053-8119\(08\)01121-X](https://doi.org/S1053-8119(08)01121-X)  
901 [pii]10.1016/j.neuroimage.2008.10.010 [doi]
- 902 Reiter, K., Nielson, K.A., Durgerian, S., Woodard, J.L., Smith, J.C., Seidenberg, M., Kelly,  
903 D.A., Rao, S.M., 2017. Five-Year Longitudinal Brain Volume Change in Healthy Elders  
904 at Genetic Risk for Alzheimer’s Disease. *J. Alzheimer’s Dis.* 55, 1363–1377.  
905 <https://doi.org/10.3233/JAD-160504>
- 906 Rey, D., Subsol, G., Delingette, H., Ayache, N., 2002. Automatic detection and segmentation  
907 of evolving processes in 3D medical images: Application to multiple sclerosis. *Med.*  
908 *Image Anal.* [https://doi.org/10.1016/S1361-8415\(02\)00056-7](https://doi.org/10.1016/S1361-8415(02)00056-7)
- 909 Ritter, K., Schumacher, J., Weygandt, M., Buchert, R., Allefeld, C., Haynes, J.D., 2015.  
910 Multimodal prediction of conversion to Alzheimer’s disease based on incomplete  
911 biomarkers. *Alzheimer’s Dement. Diagnosis, Assess. Dis. Monit.* 1, 206–215.  
912 <https://doi.org/10.1016/j.dadm.2015.01.006>
- 913 Rowe, C.C., Doré, V., Jones, G., Baxendale, D., Mulligan, R.S., Bullich, S., Stephens, A.W.,  
914 De Santi, S., Masters, C.L., Dinkelborg, L., Villemagne, V.L., 2017. 18F-Florbetaben  
915 PET beta-amyloid binding expressed in Centiloids. *Eur. J. Nucl. Med. Mol. Imaging* 44,  
916 2053–2059. <https://doi.org/10.1007/s00259-017-3749-6>
- 917 Salvatore, C., Cerasa, A., Castiglioni, I., 2018. MRI Characterizes the Progressive Course of  
918 AD and Predicts Conversion to Alzheimer’s Dementia 24 Months Before Probable  
919 Diagnosis. *Front. Aging Neurosci.* 10, 135. <https://doi.org/10.3389/fnagi.2018.00135>

- 920 Shen, L., Firpi, H.A., Saykin, A.J., West, J.D., 2009. Parametric surface modeling and  
921 registration for comparison of manual and automated segmentation of the hippocampus.  
922 *Hippocampus* 19, 588–595. <https://doi.org/10.1002/hipo.20613>
- 923 Shi, J., Leporé, N., Gutman, B.A., Thompson, P.M., Baxter, L.C., Caselli, R.J., Wang, Y., 2014.  
924 Genetic influence of apolipoprotein E4 genotype on hippocampal morphometry: An N =  
925 725 surface-based Alzheimer’s disease neuroimaging initiative study. *Hum. Brain Mapp.*  
926 <https://doi.org/10.1002/hbm.22447>
- 927 Shi, J., Stonnington, C.M., Thompson, P.M., Chen, K., Gutman, B., Reschke, C., Baxter, L.C.,  
928 Reiman, E.M., Caselli, R.J., Wang, Y., 2015. Studying ventricular abnormalities in mild  
929 cognitive impairment with hyperbolic Ricci flow and tensor-based morphometry.  
930 *Neuroimage*. <https://doi.org/10.1016/j.neuroimage.2014.09.062>
- 931 Shi, J., Thompson, P.M., Gutman, B., Wang, Y., 2013a. Surface fluid registration of conformal  
932 representation: Application to detect disease burden and genetic influence on  
933 hippocampus. *Neuroimage*. <https://doi.org/10.1016/j.neuroimage.2013.04.018>
- 934 Shi, J., Thompson, P.M., Wang, Y., 2011. Human Brain Mapping with Conformal Geometry  
935 and Multivariate Tensor-Based Morphometry, in: *Lecture Notes in Computer Science*  
936 (Including Subseries *Lecture Notes in Artificial Intelligence* and *Lecture Notes in*  
937 *Bioinformatics*). pp. 126–134. [https://doi.org/10.1007/978-3-642-24446-9\\_16](https://doi.org/10.1007/978-3-642-24446-9_16)
- 938 Shi, J., Wang, Y., Ceschin, R., An, X., Lao, Y., Vanderbilt, D., Nelson, M.D., Thompson, P.M.,  
939 Panigrahy, A., Leporé, N., 2013b. A Multivariate Surface-Based Analysis of the Putamen  
940 in Premature Newborns: Regional Differences within the Ventral Striatum. *PLoS One*.  
941 <https://doi.org/10.1371/journal.pone.0066736>
- 942 Sperling, Reisa A, Aisen, P.S., Beckett, L.A., Bennett, D.A., Craft, S., Fagan, A.M., Iwatsubo,  
943 T., Jack, C.R., Kaye, J., Montine, T.J., Park, D.C., Reiman, E.M., Rowe, C.C., Siemers,  
944 E., Stern, Y., Yaffe, K., Carrillo, M.C., Thies, B., Morrison-Bogorad, M., Wagster, M. V,  
945 Phelps, C.H., 2011. Toward defining the preclinical stages of Alzheimer’s disease:  
946 recommendations from the National Institute on Aging-Alzheimer’s Association



- 947 workgroups on diagnostic guidelines for Alzheimer's disease. *Alzheimers. Dement.* 7,  
948 280–92. <https://doi.org/10.1016/j.jalz.2011.03.003>
- 949 Sperling, Reisa A., Jack, C.R., Black, S.E., Frosch, M.P., Greenberg, S.M., Hyman, B.T.,  
950 Scheltens, P., Carrillo, M.C., Thies, W., Bednar, M.M., Black, R.S., Brashear, H.R.,  
951 Grundman, M., Siemers, E.R., Feldman, H.H., Schindler, R.J., 2011. Amyloid-related  
952 imaging abnormalities in amyloid-modifying therapeutic trials: Recommendations from  
953 the Alzheimer's Association Research Roundtable Workgroup. *Alzheimer's Dement.* 7,  
954 367–385. <https://doi.org/10.1016/j.jalz.2011.05.2351>
- 955 Styner, M., Lieberman, J.A., Pantazis, D., Gerig, G., 2004. Boundary and medial shape analysis  
956 of the hippocampus in schizophrenia. *Med Image Anal* 8, 197–203.  
957 <https://doi.org/10.1016/j.media.2004.06.004>
- 958 Styner, M., Oguz, I., Xu, S., Brechbühler, C., Pantazis, D., Levitt, J.J., Shenton, M.E., Gerig,  
959 G., 2006. Framework for the Statistical Shape Analysis of Brain Structures using  
960 SPHARM-PDM. *Insight J.* 242–250.
- 961 Su, Y., Blazey, T.M., Snyder, A.Z., Raichle, M.E., Marcus, D.S., Ances, B.M., Bateman, R.J.,  
962 Cairns, N.J., Aldea, P., Cash, L., Christensen, J.J., Friedrichsen, K., Hornbeck, R.C.,  
963 Farrar, A.M., Owen, C.J., Mayeux, R., Brickman, A.M., Klunk, W., Price, J.C.,  
964 Thompson, P.M., Ghetti, B., Saykin, A.J., Sperling, R.A., Johnson, K.A., Schofield, P.R.,  
965 Buckles, V., Morris, J.C., Benzinger, T.L.S., 2015. Partial volume correction in  
966 quantitative amyloid imaging. *Neuroimage.*  
967 <https://doi.org/10.1016/j.neuroimage.2014.11.058>
- 968 Su, Y., Flores, S., Wang, G., Hornbeck, R.C., Speidel, B., Joseph-Mathurin, N., Vlassenko,  
969 A.G., Gordon, B.A., Koeppe, R.A., Klunk, W.E., Jack, C.R., Farlow, M.R., Salloway, S.,  
970 Snider, B.J., Berman, S.B., Roberson, E.D., Brosch, J., Jimenez-Velazques, I., van Dyck,  
971 C.H., Galasko, D., Yuan, S.H., Jayadev, S., Honig, L.S., Gauthier, S., Hsiung, G.Y.R.,  
972 Masellis, M., Brooks, W.S., Fulham, M., Clarnette, R., Masters, C.L., Wallon, D.,  
973 Hannequin, D., Dubois, B., Pariente, J., Sanchez-Valle, R., Mummery, C., Ringman, J.M.,

- 974 Bottlaender, M., Klein, G., Milosavljevic-Ristic, S., McDade, E., Xiong, C., Morris, J.C.,  
975 Bateman, R.J., Benzinger, T.L.S., 2019. Comparison of Pittsburgh compound B and  
976 florbetapir in cross-sectional and longitudinal studies. *Alzheimer's Dement. Diagnosis,*  
977 *Assess. Dis. Monit.* <https://doi.org/10.1016/j.dadm.2018.12.008>
- 978 Sun, D., van Erp, T.G.M., Thompson, P.M., Bearden, C.E., Daley, M., Kushan, L., Hardt, M.E.,  
979 Nuechterlein, K.H., Toga, A.W., Cannon, T.D., 2009. Elucidating a Magnetic Resonance  
980 Imaging-Based Neuroanatomic Biomarker for Psychosis: Classification Analysis Using  
981 Probabilistic Brain Atlas and Machine Learning Algorithms. *Biol. Psychiatry.*  
982 <https://doi.org/10.1016/j.biopsych.2009.07.019>
- 983 Thompson, P.M., Gledd, J.N., Woods, R.P., MacDonald, D., Evans, A.C., Toga, A.W., 2000.  
984 Growth patterns in the developing brain detected by using continuum mechanical tensor  
985 maps. *Nature.* <https://doi.org/10.1038/35004593>
- 986 Thompson, Paul M., Hayashi, K.M., De Zubicaray, G.I., Janke, A.L., Rose, S.E., Semple, J.,  
987 Hong, M.S., Herman, D.H., Gravano, D., Doddrell, D.M., Toga, A.W., 2004. Mapping  
988 hippocampal and ventricular change in Alzheimer disease. *Neuroimage.*  
989 <https://doi.org/10.1016/j.neuroimage.2004.03.040>
- 990 Thompson, Paul M, Hayashi, K.M., Sowell, E.R., Gogtay, N., Giedd, J.N., Rapoport, J.L., de  
991 Zubicaray, G.I., Janke, A.L., Rose, S.E., Semple, J., Doddrell, D.M., Wang, Y., van Erp,  
992 T.G.M., Cannon, T.D., Toga, A.W., 2004. Mapping cortical change in Alzheimer's  
993 disease, brain development, and schizophrenia. *Neuroimage* 23, S2–S18.  
994 <https://doi.org/10.1016/j.neuroimage.2004.07.071>
- 995 Tosun, D., Chen, Y.-F., Yu, P., Sundell, K.L., Suhy, J., Siemers, E., Schwarz, A.J., Weiner,  
996 M.W., 2016. Amyloid status imputed from a multimodal classifier including structural  
997 MRI distinguishes progressors from nonprogressors in a mild Alzheimer's disease clinical  
998 trial cohort. *Alzheimer's Dement.* 12, 977–986. <https://doi.org/10.1016/j.jalz.2016.03.009>
- 999 Tosun, D., Joshi, S., Weiner, M.W., 2014. Multimodal MRI-based imputation of the A  $\beta$  + in  
1000 early mild cognitive impairment. *Ann. Clin. Transl. Neurol.* 1, 160–170.

- 1001 <https://doi.org/10.1002/acn3.40>
- 1002 Vanwinckelen, G., Blockeel, H., 2012. On estimating model accuracy with repeated cross-  
1003 validation. 21st Belgian-Dutch Conf. Mach. Learn.
- 1004 Vounou, M., Nichols, T.E., Montana, G., Initiative, A.D.N., others, 2010. Discovering genetic  
1005 associations with high-dimensional neuroimaging phenotypes: a sparse reduced-rank  
1006 regression approach. *Neuroimage* 53, 1147–1159.
- 1007 Wang, Y., Chan, T.F., Toga, A.W., Thompson, P.M., 2009. Multivariate tensor-based brain  
1008 anatomical surface morphometry via holomorphic one-forms, in: *Lecture Notes in*  
1009 *Computer Science (Including Subseries Lecture Notes in Artificial Intelligence and*  
1010 *Lecture Notes in Bioinformatics)*. [https://doi.org/10.1007/978-3-642-04268-3\\_42](https://doi.org/10.1007/978-3-642-04268-3_42)
- 1011 Wang, Y., Lui, L.M., Gu, X., Hayashi, K.M., Chan, T.F., Toga, A.W., Thompson, P.M., Yau,  
1012 S.T., 2007. Brain surface conformal parameterization using riemann surface structure.  
1013 *IEEE Trans. Med. Imaging*. <https://doi.org/10.1109/TMI.2007.895464>
- 1014 Wang, Y., Shi, J., Yin, X., Gu, X., Chan, T.F., Yau, S.T., Toga, A.W., Thompson, P.M., 2012.  
1015 Brain surface conformal parameterization with the ricci flow. *IEEE Trans. Med. Imaging*.  
1016 <https://doi.org/10.1109/TMI.2011.2168233>
- 1017 Wang, Y., Song, Y., Rajagopalan, P., An, T., Liu, K., Chou, Y.Y., Gutman, B., Toga, A.W.,  
1018 Thompson, P.M., 2011. Surface-based TBM boosts power to detect disease effects on the  
1019 brain: An N=804 ADNI study. *Neuroimage*.  
1020 <https://doi.org/10.1016/j.neuroimage.2011.03.040>
- 1021 Wang, Y., Yuan, L., Shi, J., Greve, A., Ye, J., Toga, A.W., Reiss, A.L., Thompson, P.M., 2013.  
1022 Applying tensor-based morphometry to parametric surfaces can improve MRI-based  
1023 disease diagnosis. *Neuroimage*. <https://doi.org/10.1016/j.neuroimage.2013.02.011>
- 1024 Wang, Y., Zhang, J., Gutman, B., Chan, T.F., Becker, J.T., Aizenstein, H.J., Lopez, O.L.,  
1025 Tamburo, R.J., Toga, A.W., Thompson, P.M., 2010. Multivariate tensor-based  
1026 morphometry on surfaces: Application to mapping ventricular abnormalities in

- 1027 HIV/AIDS. Neuroimage 49, 2141–2157.  
1028 <https://doi.org/10.1016/j.neuroimage.2009.10.086>
- 1029 Wu, J., Zhang, J., Shi, J., Chen, K., Caselli, R.J., Reiman, E.M., Wang, Y., 2018. Hippocampus  
1030 morphometry study on pathology-confirmed Alzheimer’s disease patients with surface  
1031 multivariate morphometry statistics, in: Proceedings - International Symposium on  
1032 Biomedical Imaging. <https://doi.org/10.1109/ISBI.2018.8363870>
- 1033 Yao, Z., Fu, Y., Wu, J., Zhang, W., Yu, Y., Zhang, Z., Wu, X., Wang, Y., Hu, B., 2018.  
1034 Morphological changes in subregions of hippocampus and amygdala in major depressive  
1035 disorder patients. Brain Imaging Behav. <https://doi.org/10.1007/s11682-018-0003-1>
- 1036 Yin, W., Osher, S., Goldfarb, D., Darbon, J., 2008. Bregman Iterative Algorithms for  $\ell_1$ -  
1037 Minimization with Applications to Compressed Sensing. SIAM J. Imaging Sci. 1, 143–  
1038 168. <https://doi.org/10.1137/070703983>
- 1039 Younes, L., Ratnanather, J.T., Brown, T., Aylward, E., Nopoulos, P., Johnson, H., Magnotta,  
1040 V.A., Paulsen, J.S., Margolis, R.L., Albin, R.L., Miller, M.I., Ross, C.A., Investigators,  
1041 P.-H., Coordinators of the Huntington Study, G., 2014. Regionally selective atrophy of  
1042 subcortical structures in prodromal HD as revealed by statistical shape analysis. Hum  
1043 Brain Mapp 35, 792–809. <https://doi.org/10.1002/hbm.22214>
- 1044 Zhang, J., Fan, Y., Li, Q., Thompson, P.M., Ye, J., Wang, Y., 2017a. Empowering cortical  
1045 thickness measures in clinical diagnosis of Alzheimer’s disease with spherical sparse  
1046 coding, in: Proceedings - International Symposium on Biomedical Imaging.  
1047 <https://doi.org/10.1109/ISBI.2017.7950557>
- 1048 Zhang, J., Li, Q., Caselli, R.J., Thompson, P.M., Ye, J., Wang, Y., 2017b. Multi-source Multi-  
1049 target Dictionary Learning for Prediction of Cognitive Decline. Springer, Cham, pp. 184–  
1050 197. [https://doi.org/10.1007/978-3-319-59050-9\\_15](https://doi.org/10.1007/978-3-319-59050-9_15)
- 1051 Zhang, J., Shi, J., Stonnington, C., Li, Q., Gutman, B.A., Chen, K., Reiman, E.M., Caselli, R.,  
1052 Thompson, P.M., Ye, J., Wang, Y., 2016a. Hyperbolic space sparse coding with its  
1053 application on prediction of Alzheimer’s disease in mild cognitive impairment, in: Lecture

- 1054 Notes in Computer Science (Including Subseries Lecture Notes in Artificial Intelligence  
1055 and Lecture Notes in Bioinformatics). [https://doi.org/10.1007/978-3-319-46720-7\\_38](https://doi.org/10.1007/978-3-319-46720-7_38)
- 1056 Zhang, J., Stonnington, C., Li, Q., Shi, J., Bauer, R.J., Gutman, B.A., Chen, K., Reiman, E.M.,  
1057 Thompson, P.M., Ye, J., Wang, Y., 2016b. Applying sparse coding to surface multivariate  
1058 tensor-based morphometry to predict future cognitive decline, in: Proceedings -  
1059 International Symposium on Biomedical Imaging.  
1060 <https://doi.org/10.1109/ISBI.2016.7493350>
- 1061 Zhang, J., Tu, Y., Li, Q., Caselli, R.J., Thompson, P.M., Ye, J., Wang, Y., 2018. Multi-task  
1062 sparse screening for predicting future clinical scores using longitudinal cortical thickness  
1063 measures, in: Proceedings - International Symposium on Biomedical Imaging.  
1064 <https://doi.org/10.1109/ISBI.2018.8363835>
- 1065
